## 1 **LZTR1 polymerization provokes cardiac pathology in recessive Noonan syndrome**

2 Alexandra Viktoria Busley, PhD<sup>1,2,3,#</sup>, Óscar Gutiérrez-Gutiérrez, PhD<sup>1,2,#</sup>, Elke Hammer,  
3 PhD<sup>2,4</sup>, Fabian Koitka, MSc<sup>1,2,3</sup>, Amin Mirzaiebadizi, PhD<sup>5</sup>, Martin Steinegger, PhD<sup>6</sup>,  
4 Constantin Pape, PhD<sup>3,7</sup>, Linda Böhmer, MSc<sup>1</sup>, Henning Schroeder, PhD<sup>8</sup>, Mandy Kleinsorge,  
5 PhD<sup>1,2</sup>, Melanie Engler, PhD<sup>9</sup>, Ion Cristian Cirstea, PhD<sup>9</sup>, Lothar Gremer, PhD<sup>10,11</sup>, Dieter  
6 Willbold, PhD<sup>10,11</sup>, Janine Altmüller, MD<sup>12,13</sup>, Felix Marbach, MD<sup>14,15</sup>, Gerd Hasenfuss,  
7 MD<sup>1,2,3</sup>, Wolfram-Hubertus Zimmermann, MD<sup>2,3,16,17</sup>, Mohammad Reza Ahmadian, PhD<sup>5</sup>,  
8 Bernd Wollnik, MD<sup>2,3,18</sup>, Lukas Cyganek, PhD<sup>1,2,3,16,\*</sup>

9

10 <sup>1</sup>Stem Cell Unit, Clinic for Cardiology and Pneumology, University Medical Center Göttingen,  
11 Göttingen, Germany; <sup>2</sup>DZHK (German Center for Cardiovascular Research), partner site  
12 Göttingen and Greifswald, Germany; <sup>3</sup>Cluster of Excellence "Multiscale Bioimaging: from  
13 Molecular Machines to Networks of Excitable Cells" (MBExC), University of Göttingen,  
14 Göttingen, Germany; <sup>4</sup>Interfaculty Institute of Genetics and Functional Genomics, University  
15 Medicine Greifswald, Greifswald, Germany; <sup>5</sup>Institute of Biochemistry and Molecular Biology  
16 II, Medical Faculty and University Hospital Düsseldorf, Heinrich Heine University Düsseldorf,  
17 Düsseldorf, Germany; <sup>6</sup>School of Biological Sciences, Seoul National University, Seoul, South  
18 Korea; <sup>7</sup>Institute of Computer Science, Georg-August University Göttingen, Göttingen,  
19 Germany; <sup>8</sup>NMR Signal Enhancement Group, Max Planck Institute for Multidisciplinary  
20 Sciences, Göttingen, Germany; <sup>9</sup>Institute of Applied Physiology, University of Ulm, Ulm,  
21 Germany; <sup>10</sup>Institute of Physical Biology, Heinrich Heine University Düsseldorf, Düsseldorf,  
22 Germany; <sup>11</sup>Institute of Biological Information Processing, Structural Biochemistry (IBI-7),  
23 Forschungszentrum Jülich, Jülich, Germany; <sup>12</sup>Cologne Center for Genomics, University of  
24 Cologne, Faculty of Medicine and University Hospital Cologne, Cologne, Germany;  
25 <sup>13</sup>Genomics Platform, Berlin Institute for Medical Systems Biology, Max-Delbrück-Center for

26 Molecular Medicine Berlin, Berlin, Germany; <sup>14</sup>Institute of Human Genetics, University  
27 Hospital Cologne, Cologne, Germany; <sup>15</sup>Institute of Human Genetics, Heidelberg University,  
28 Heidelberg, Germany; <sup>16</sup>Institute of Pharmacology and Toxicology, University Medical Center  
29 Göttingen, Göttingen, Germany; <sup>17</sup>Translational Neuroinflammation and Automated  
30 Microscopy, Fraunhofer Institute for Translational Medicine and Pharmacology ITMP,  
31 Göttingen, Germany; <sup>18</sup>Institute of Human Genetics, University Medical Center Göttingen,  
32 Göttingen, Germany.

33 # Alexandra Viktoria Busley and Óscar Gutiérrez-Gutiérrez contributed equally.

34 \* Corresponding author: lukas.cyganek@gwdg.de

35

36 **Address for correspondence:**

37 Dr. Lukas Cyganek

38 Clinic for Cardiology and Pneumology

39 University Medical Center Göttingen

40 Robert-Koch-Str. 40, 37075 Göttingen, Germany

41 Tel: +49 551 39 64280, Mail: lukas.cyganek@gwdg.de

42

43 **Running title:**

44 LZTR1 polymerization causes hypertrophy

45 **Abstract**

46 Noonan syndrome patients harboring causative variants in *LZTR1* are particularly at risk to  
47 develop severe and early-onset hypertrophic cardiomyopathy. However, the underlying disease  
48 mechanisms of *LZTR1* missense variants driving the cardiac pathology are poorly understood.  
49 Hence, therapeutic options for Noonan syndrome patients are limited. In this study, we  
50 investigated the mechanistic consequences of a novel homozygous causative variant  
51 *LZTR1*<sup>L580P</sup> by using patient-specific and CRISPR/Cas9-corrected iPSC-cardiomyocytes.  
52 Molecular, cellular, and functional phenotyping in combination with *in silico* prediction of  
53 protein complexes uncovered a unique *LZTR1*<sup>L580P</sup>-specific disease mechanism provoking the  
54 cardiac hypertrophy. The homozygous variant was predicted to alter the binding affinity of the  
55 dimerization domains facilitating the formation of linear LZTR1 polymer chains. The altered  
56 polymerization resulted in dysfunction of the LZTR1-cullin 3 ubiquitin ligase complexes and  
57 subsequently, in accumulation of RAS GTPases, thereby provoking global pathological  
58 changes of the proteomic landscape ultimately leading to cellular hypertrophy. Furthermore,  
59 our data showed that cardiomyocyte-specific MRAS degradation is mediated by LZTR1 via the  
60 autophagosome, whereas RIT1 degradation is mediated by both LZTR1-dependent and  
61 LZTR1-independent proteasomal pathways. Importantly, uni- or biallelic genetic correction of  
62 the *LZTR1*<sup>L580P</sup> missense variant rescued the molecular and cellular disease-associated  
63 phenotype, providing proof-of-concept for CRISPR-based gene therapies.

64

65 **Keywords**

66 Cardiomyocytes / Hypertrophic cardiomyopathy / iPSCs / LZTR1 / Noonan syndrome

## 67 **Introduction**

68 Noonan syndrome (NS) is a multi-systemic developmental disorder with a broad spectrum of  
69 symptoms and varying degrees of disease severity. Common clinical symptoms range from  
70 intellectual disability, facial dysmorphisms, webbed neck, skeletal deformities, short stature,  
71 and in many cases congenital heart disease.<sup>1</sup> With a prevalence of approximately 1 in 1,000 –  
72 2,500 live births, NS is considered the most common monogenic disease associated with  
73 congenital heart defects and early-onset hypertrophic cardiomyopathy (HCM).<sup>2</sup> Young NS  
74 patients diagnosed with HCM are more prone to develop heart failure accompanied by a poor  
75 late survival in contrast to patients suffering from non-syndromic HCM.<sup>3,4</sup> Like other  
76 phenotypically overlapping syndromes classified as RASopathies, NS is caused by variants in  
77 RAS-mitogen-activated protein kinase (MAPK)-associated genes, all typically leading to an  
78 increase in signaling transduction.<sup>5</sup> Within the RASopathy spectrum, patients harboring  
79 causative gene variants in *RAF1*, *HRAS*, *RIT1* and *LZTR1* are particularly at risk to develop  
80 severe and early-onset HCM.<sup>6,7</sup>

81 Recent studies by others and our group have revealed the functional role of *LZTR1* within the  
82 RAS-MAPK signaling cascade as a negative regulator of signaling activity. *LZTR1* encodes an  
83 adapter protein of the cullin 3 ubiquitin ligase complex by selectively targeting RAS proteins  
84 as substrates for degradation. *LZTR1* deficiency – caused by truncating or missense variants –  
85 results in an accumulation of the RAS protein pool and, as a consequence, in RAS-MAPK  
86 signaling hyperactivity.<sup>8-10</sup> Whereas dominant *LZTR1* variants generally cluster in the Kelch  
87 motif perturbing RAS binding to the ubiquitination complex,<sup>11</sup> the mechanistic consequences  
88 of recessive *LZTR1* missense variants, which are distributed over the entire protein, are not  
89 understood.

90 Human induced pluripotent stem cell-derived cardiomyocytes (iPSC-CMs) generated from  
91 patients with inherited forms of cardiomyopathies offer a unique platform to study the disease

92 mechanisms in physiologically relevant cells and tissues.<sup>12,13</sup> A few RASopathy-linked iPSC-  
93 CM models had been described, including for variants in *PTPN11*, *RAF1*, *BRAF*, and *MRAS*.<sup>14-</sup>  
94 <sup>17</sup> In line, we had recently added novel information as to the role of *LZTR1*-truncating variants  
95 in NS pathophysiology.<sup>10,18</sup> In the present study, we aimed to investigate the molecular, cellular,  
96 and functional consequences of a specific recessive missense variant *LZTR1*<sup>L580P</sup> by utilizing  
97 patient-derived and CRISPR-corrected iPSC-CMs. We could show that *LZTR1*<sup>L580P</sup> in  
98 homozygous state results in aberrant polymerization causing LZTR1 dysfunction, marked  
99 increase of RAS GTPase levels, and cellular hypertrophy. Further, uni- and bi-allelic genetic  
100 correction of the missense variant by CRISPR/Cas9 technology rescued the cellular phenotype,  
101 indicating that correction of one allele is sufficient to restore the cardiac pathophysiology,  
102 thereby providing proof-of-concept for future personalized CRISPR-based gene therapies.

103

## 104 **Results**

### 105 *LZTR1*<sup>L580P</sup> is causative for recessive Noonan syndrome

106 A 17-year old male patient with HCM, stress-induced cardiac arrhythmias, pectus excavatum  
107 and facial anomalies was referred to our clinic, and based on the combination of symptoms, the  
108 clinical diagnosis of Noonan syndrome was made (Figure 1A, and Table S1 in the supplement).  
109 The patient was born to a consanguineous couple and both parents showed neither apparent  
110 clinical symptoms nor distinctive NS-specific features. Whole exome sequencing followed by  
111 detailed variant analysis detected one highly suspicious homozygous variant in *LZTR1*. Both  
112 parents were heterozygous carriers and the variant was not present in any current database of  
113 human genetic variations including the >250,000 alleles of gnomAD database. The  
114 homozygous missense variant, c.1739T>C, was located in exon 15 of the *LZTR1* gene and leads  
115 to the substitution of an evolutionary conserved leucine at the amino acid position 580 by

116 proline (p.Leu580Pro, p.L580P). The variant was predicted as likely pathogenic by  
117 computational predictions.

118 To elucidate the molecular and functional consequences of the *LZTR1*<sup>L580P</sup> missense variant,  
119 we generated iPSCs from the patient's skin fibroblasts using integration-free reprogramming  
120 methods and subsequently utilized CRISPR/Cas9 genome editing to engineer gene variant-  
121 corrected iPSC lines (Figure 1B). For genetic correction of the patient-specific iPSCs, the  
122 CRISPR guide RNA was designed to specifically target the mutated sequence in exon 15 of the  
123 *LZTR1* gene. Further, the ribonucleoprotein-based CRISPR/Cas9 complex was combined with  
124 a single-stranded oligonucleotide serving as template for homology-directed repair (Figure 1C).  
125 Upon transfection, cells were singularized and individual clones were screened for successful  
126 editing to identify heterozygous corrected as well as homozygous corrected iPSC clones,  
127 *LZTR1*<sup>corr-het</sup> and *LZTR1*<sup>corr-hom</sup>, respectively (Figure 1D). Molecular karyotyping of the edited  
128 iPSC clones confirmed chromosomal stability after genome editing and passaging (Figure 1E).  
129 As expected for individuals born to consanguineous parents, patient-specific as well as  
130 CRISPR-corrected iPSCs demonstrated a noticeable reduction of the overall heterozygosity  
131 using SNP-based genome-wide arrays, with around 30% of segments of the genome being  
132 assigned to regions of heterozygosity. Further, sequencing revealed no obvious off-target  
133 modifications by genome editing (Figure S1 in the supplement). Subsequently, patient-derived  
134 and CRISPR-corrected iPSCs were verified for pluripotency (Figure 1F-H). In addition to the  
135 patient-derived iPSC lines, iPSC lines from two unrelated healthy male donors, namely WT1  
136 and WT11, were used as wild type (WT) controls in this study.

137 At first, we aimed to determine whether the *LZTR1*<sup>L580P</sup> protein remains stably expressed or is  
138 rapidly degraded after protein translation. *LZTR1* proteins were robustly detected by Western  
139 blot in differentiated iPSC-CMs (Figure 1I-K). Interestingly, significantly higher *LZTR1*  
140 protein levels were present in the patient-specific and the heterozygous corrected iPSC-CMs

141 compared to WT and homozygous corrected cultures, suggesting an accumulation of the mutant  
142 LZTR1<sup>L580P</sup> proteins in the cells.

143

144 *Homozygous LZTR1<sup>L580P</sup> causes accumulation of RAS GTPases*

145 To investigate the impact of the identified homozygous LZTR1<sup>L580P</sup> missense variant on the  
146 molecular mechanisms contributing to left ventricular hypertrophy, patient-specific,  
147 heterozygous and homozygous corrected, as well as two individual WT iPSC lines were  
148 differentiated into functional ventricular-like iPSC-CMs in feeder-free culture conditions,<sup>19</sup> and  
149 on day 60 of differentiation subjected to unbiased proteome analyses (Figure 2A). We identified  
150 more than 4,700 proteins in the samples from the individual groups. All samples showed a  
151 comparably high abundance of prominent cardiac markers including myosin heavy chain  $\beta$   
152 (*MHY7*), cardiac troponin T (*TNNT2*),  $\alpha$ -actinin (*ACTN2*), titin (*TTN*), and ventricular-specific  
153 myosin light chain 2 (*MYL2*), indicating equal cardiomyocyte content in the different cultures  
154 (Figure 2B). By comparing the proteome profiles of LZTR1<sup>L580P</sup> and WT iPSC-CMs, we  
155 identified enhanced abundance of the RAS family members muscle RAS oncogene homolog  
156 (MRAS) and RIT1 in the patient's iPSC-CMs (Figure 2C). This finding is in agreement with  
157 our previous observation in LZTR1-truncating variant carriers<sup>10</sup> and confirms the pivotal role  
158 of LZTR1 in targeting various RAS GTPases for LZTR1-cullin 3 ubiquitin ligase complex-  
159 mediated ubiquitination, and degradation.<sup>8,9</sup> Further, it highlights that LZTR1<sup>L580P</sup> results in  
160 protein loss-of-function, causing an accumulation of RAS proteins in the cells, providing  
161 molecular evidence for the causative nature of the missense variant. Strikingly, protein levels  
162 of the different RAS GTPases were normalized in both the heterozygous as well as the  
163 homozygous corrected iPSC-CMs, confirming that only one functional LZTR1 allele is  
164 sufficient to regulate the protein pool of RAS GTPases in cardiomyocytes (Figure 2D-E). As  
165 anticipated, transcriptome analyses showed similar mRNA expression levels of the different

166 RAS GTPases in the patient's and CRISPR-corrected iPSC lines, indicating a post-translational  
167 cause for the higher abundance of RAS proteins in LZTR1<sup>L580P</sup> cultures (Figure S2 in the  
168 supplement). In contrast, the significantly elevated protein levels of the protein quality control-  
169 associated heat shock-related 70 kDa protein 2 (*HSPA2*) in the patient's cells in comparison to  
170 the WT and CRISPR-corrected cells were related to upregulation of gene expression,  
171 suggesting that *HSPA2* is not directly targeted by LZTR1 for degradation.

172 To assess the correlation of the different proteomic profiles with respect to the disease-specific  
173 proteome signatures upon *LZTR1* deficiency, we performed a comparison analysis of the data  
174 sets from (1) LZTR1<sup>L580P</sup> versus WT, (2) LZTR1<sup>corr-het</sup> versus LZTR1<sup>L580P</sup>, and (3) LZTR1<sup>corr-</sup>  
175 <sup>hom</sup> versus LZTR1<sup>L580P</sup>. We found 78 proteins being differentially regulated in all three data sets  
176 (Figure 2F). Here, a profound subset of proteins of the overlapping profile that was significantly  
177 higher abundant in the patient's cells, such as the MAPK-activated protein kinase RPS6KA3,  
178 was normalized after heterozygous and homozygous CRISPR-correction of the pathological  
179 *LZTR1* variant. Vice versa, numerous downregulated proteins in the patient samples were found  
180 to be elevated in the gene-edited iPSC-CMs. Further, we performed a Reactome pathway  
181 enrichment analysis to uncover dysregulated pathways and/or biological processes associated  
182 to *LZTR1*<sup>L580P</sup>. The analysis indicated that differentially abundant proteins in patient-derived  
183 samples were enriched in critical cardiac-related biological processes, such as muscle  
184 contraction and extracellular matrix organization, as well as in cellular routes associated to  
185 metabolism (Figure 2G). In agreement with the proteomic data, Western blot analysis  
186 confirmed the strong accumulation of MRAS, RIT1, and the classical RAS GTPases (HRAS,  
187 KRAS, and NRAS; detected by pan-RAS) in the LZTR1<sup>L580P</sup> cultures, and further confirmed a  
188 normalization of RAS levels in the CRISPR-corrected isogenic iPSC-CMs to WT control levels  
189 (Figure 2H-K).

190 Collectively, these data demonstrate that the missense variant *LZTR1*<sup>L580P</sup> in homozygosity



191 resulted in protein loss-of-function causing an accumulation of RAS GTPases as the critical  
192 underlying disease mechanism in cardiomyocytes from the NS patient. In line, correction of the  
193 homozygous missense variant on at least one allele normalized the molecular pathology.

194

195 *Homozygous LZTR1<sup>L580P</sup> retains a residual protein function*

196 To explore the impact of RAS GTPase accumulation on RAS-MAPK signaling activity, we  
197 used an ERK kinase translocation reporter (ERK-KTR) to measure ERK signaling dynamics in  
198 live cells.<sup>20</sup> Patient-specific, heterozygous and homozygous corrected, and WT iPSC-CMs were  
199 efficiently transduced with the ERK-KTR lentivirus, and the activity of ERK was analyzed at  
200 day 60 of differentiation by measuring the ratio of cytosolic (corresponding to active ERK) to  
201 nuclear (corresponding to inactive ERK) fluorescent signals (Figure 3A,B). The specificity of  
202 the ERK biosensor was confirmed by a selective response to MEK inhibition, whereas no  
203 change in ERK biosensor activity was observed when cells were treated with an inhibitor of the  
204 JNK pathway (Figure S3 in the supplement). Biosensor-transduced iPSC-CM cultures were  
205 treated with the MEK inhibitor trametinib (MEKi) or with DMSO for 60 minutes, before  
206 stimulation with fetal bovine serum for another 60 minutes, and imaged every 10 minutes  
207 (Figure 3C, and Figure S3 in the supplement). Under basal conditions, an equally low level of  
208 ERK activity was observed across all iPSC lines (Figure 3D). As expected, a strong increase in  
209 ERK activity was detected upon stimulation of the cells, while MEK inhibition was effective  
210 in normalizing ERK signaling activity (Figure 3D). The results of the imaging-based approach  
211 were confirmed by Western blot analysis of uncorrected and CRISPR-corrected iPSC-CMs  
212 (Figure 3E).

213 Since we did not observe increased ERK activity attributed to the homozygous *LZTR1<sup>L580P</sup>*  
214 missense variant, we compared the patient-specific *LZTR1<sup>L580P</sup>* cells with another patient line

215 harboring biallelic *LZTR1* variants causing complete loss of LZTR1 protein expression  
216 (*LZTR1*<sup>KO</sup>), which we reported in our previous study.<sup>10</sup> Here, higher levels of phosphorylated  
217 ERK were observed in the *LZTR1*<sup>KO</sup> cultures under basal conditions and after stimulation  
218 (Figure 3F,G). Interestingly, *LZTR1*<sup>KO</sup> iPSC-CMs exhibited a substantially higher  
219 accumulation of RAS GTPases compared to *LZTR1*<sup>L580P</sup> cells, implying a partial residual  
220 function of *LZTR1*<sup>L580P</sup> ubiquitin ligase complexes.

221

### 222 *Homozygous LZTR1<sup>L580P</sup> provokes cardiomyocyte hypertrophy*

223 To elucidate the consequences of dysregulated RAS-MAPK signaling on the cellular  
224 characteristics of cardiomyocytes, we investigated the sarcomere homogeneity, the overall  
225 myofibril organization, and the cell size of the patient-derived iPSC-CMs, the CRISPR-  
226 corrected cells, as well as the WT controls at day 60 of differentiation (Figure 4A).  
227 Immunocytochemical staining of cardiac subtype-specific proteins revealed that all iPSC lines  
228 exhibit a well-organized sarcomeric organization with a pronounced striated expression of  $\alpha$ -  
229 actinin and ventricular-specific MLC2V (Figure 4B). In order to analyze the homogeneity of  
230 sarcomeres in detail, we measured the distances between the sarcomeric Z-disks along  
231 individual myofibrils (Figure 4C). In agreement with the sarcomere length previously observed  
232 in neonatal and adult human hearts,<sup>21</sup> *LZTR1*-deficient as well as corrected and WT cells  
233 revealed a typical sarcomere length ranging from 1.7 to 2.2  $\mu\text{m}$  with an average of  
234 approximately 1.9  $\mu\text{m}$  across all iPSC lines (Figure 4D). As sarcomeric disarray has been  
235 frequently reported in other iPSC-CM models of both NS-associated and non-syndromic  
236 HCM,<sup>15,22</sup> we examined the myofibril organization in the individual iPSC-CMs stained for  $\alpha$ -  
237 actinin by Fast Fourier Transform. The quantitative analysis did neither reveal any decrease of  
238 sarcomere regularity nor any pathological myofibril organization in *LZTR1*<sup>L580P</sup> cultures  
239 (Figure 4E). On the contrary, *LZTR1*<sup>L580P</sup> and CRISPR-corrected iPSC-CMs even

240 demonstrated a slightly higher myofibril regularity compared to unrelated controls, indicating  
241 that the pathological gene variant has no severe impact on sarcomere structures.

242 As cardiomyocyte hypertrophy is a major hallmark of HCM, we further investigated the  
243 medium cell size of iPSC-CMs from all cell lines by utilizing our previously established assay  
244 to determine the cell size of iPSC-CMs in suspension.<sup>10</sup> Here, the patient's iPSC-CMs displayed  
245 a significant cellular enlargement compared to WT iPSC-CMs (Figure 4F). Strikingly, the  
246 hypertrophic phenotype was normalized in the CRISPR-corrected cells from both the  
247 LZTR1<sup>corr-het</sup> and the LZTR1<sup>corr-hom</sup> isogenic cultures. Moreover, and in line with the molecular  
248 observations, heterozygous correction of the pathological variant was sufficient to significantly  
249 reduce cellular hypertrophy. Additionally, we assessed whether treatment with the MEK  
250 inhibitor trametinib for 5 days could reverse the cellular hypertrophy in the patient-specific  
251 iPSC-CMs (Figure 4G). No significant reduction in cell size was observed in MEKi-treated  
252 cells compared to DMSO-treated cells, suggesting that normalization of RAS-MAPK signaling  
253 activity is unable to alleviate the cellular pathology in the short term.

254 In summary, the patient's iPSC-CMs harboring the homozygous missense variant *LZTR1*<sup>L580P</sup>  
255 recapitulated the cardiomyocyte hypertrophy *in vitro*. Importantly, CRISPR-correction of the  
256 pathological variant was able to normalize the hypertrophic phenotype.

257

258 *Homozygous LZTR1<sup>L580P</sup> does not compromise contractile function*

259 NS-associated HCM as well as inherited forms of non-syndromic HCM are frequently  
260 associated with contractile dysfunction and these patients are at risk for developing  
261 arrhythmias.<sup>23,24</sup> Hence, we generated engineered heart muscles (EHMs) from diseased,  
262 CRISPR-corrected, and WT iPSC-CMs enabling us to investigate the functional characteristics  
263 in a three-dimensional environment closer resembling the native conditions of the human heart

264 muscle (Figure 5A).<sup>25,26</sup> Microscopically, all iPSC lines formed homogenous cardiac tissues  
265 without showing apparent cell line-dependent differences after six weeks of cultivation and  
266 maturation (Figure 5B). Optical measurements were performed to study beating rate, force of  
267 contraction, and contraction kinetics in spontaneously contracting EHMs (Figure 5C). In  
268 comparison to WT EHMs, an increased spontaneous beat frequency was detected in the  
269 LZTR1<sup>L580P</sup> EHMs (Figure 5D). The beat rate acceleration was gradually normalized in the  
270 heterozygous and homozygous corrected variants. Low beat-to-beat variability indicated that  
271 the LZTR1 mutant tissues do not provoke arrhythmia (Figure 5E). No significant differences  
272 in force of contraction were identified (Figure 5F). In accordance with higher beat frequencies,  
273 an acceleration of contraction and relaxation kinetics were observed in LZTR1<sup>L580P</sup>-, LZTR1<sup>corr-</sup>  
274 <sup>het</sup>- and the LZTR1<sup>corr-hom</sup>-derived EHMs (Figure 5G,H). However, since the altered kinetics  
275 were noticed in both diseased and CRISPR-corrected tissues, this rather suggested a mutation-  
276 independent effect. In addition, we examined the contractile properties of 2D cardiac monolayer  
277 cultures by video analysis and did not observe any significant differences between WT, patient-  
278 specific, CRISPR-corrected, and LZTR1<sup>KO</sup> iPSC lines (Figure S4 in the supplement).

279 Taken together, this functional data indicates that the missense variant *LZTR1*<sup>L580P</sup> does not  
280 significantly impact the contractile function and rhythmogenesis of cardiomyocytes.

281

282 *Homozygous LZTR1*<sup>L580P</sup> induces polymerization of LZTR1-cullin 3 ubiquitin ligase complexes

283 Considering the severe consequence of *LZTR1*<sup>L580P</sup> on the molecular and cellular  
284 pathophysiology in cardiomyocytes, we aimed to determine the specific effect of this variant  
285 on protein structure, complex formation, as well as its subcellular localization. We were not  
286 able to visualize endogenous LZTR1 in our cell model by immunocytochemistry, neither by  
287 testing of multiple commercial antibodies nor by N-terminal or C-terminal genetic tagging of

288 the *LZTR1* gene locus. In order to circumvent these obstacles, we established ectopic expression  
289 of tagged *LZTR1* in WT iPSC-CMs at around day 60 of differentiation by lipofectamine-based  
290 plasmid transfection (Figure 6A). Besides *LZTR1*<sup>WT</sup> and *LZTR1*<sup>L580P</sup>, we screened the NS  
291 patient database<sup>27</sup> for additional missense variants classified as likely pathogenic or variant of  
292 uncertain significance and located in close proximity to *LZTR1*<sup>L580P</sup> (within the BACK1  
293 domain), and included these in our screening panel (Figure 6B). Of note, except for *LZTR1*<sup>L580P</sup>  
294 and *LZTR1*<sup>E563Q</sup>,<sup>7</sup> none of the other variants had been reported to be present in homozygosity  
295 in *LZTR1*-associated NS. In addition, we also included a truncating variant *LZTR1*<sup>ΔBTB2-BACK2</sup>,  
296 lacking the entire BTB2-BACK2 domain, that mimicked the genotype of the two siblings  
297 described in our previous study.<sup>10</sup>

298 As previously observed in other cell types (such as HeLa<sup>8</sup> and HEK293<sup>28</sup>), *LZTR1*<sup>WT</sup> presented  
299 as dotted pattern equally distributed throughout the cell (Figure 6C, Figure S5A in the  
300 supplement). A similar dotted appearance was observed for the variants *LZTR1*<sup>E563Q</sup>,  
301 *LZTR1*<sup>I570T</sup>, *LZTR1*<sup>V579M</sup>, *LZTR1*<sup>E584K</sup>, and *LZTR1*<sup>R619H</sup>. As expected, the truncating variant  
302 *LZTR1*<sup>ΔBTB2-BACK2</sup> showed a mislocalized homogeneous cytoplasmic distribution. Surprisingly,  
303 missense variant *LZTR1*<sup>L580P</sup> formed large filaments within the cytoplasm (Figure 6C, Figure  
304 S5A in the supplement). To verify this initial finding, we co-expressed two differentially tagged  
305 *LZTR1* constructs and evaluated their overlap within the cells. In accordance, *LZTR1*<sup>L580P</sup>  
306 appeared as large protein polymers, whereas *LZTR1*<sup>WT</sup> remained speckle-like (Figure 6D). As  
307 *LZTR1*<sup>L580P</sup> in heterozygous state did not induce a disease phenotype based on our clinical and  
308 our experimental evidence, we hypothesized that co-expression of *LZTR1*<sup>L580P</sup> and *LZTR1*<sup>WT</sup>  
309 might resolve the polymer chains. Strikingly, the *LZTR1*<sup>L580P</sup>-induced filaments dispersed  
310 when co-expressed with the WT variant, implicating that the *LZTR1* complexes exclusively  
311 assembled to large protein polymers when the specific *LZTR1*<sup>L580P</sup> missense variant is present  
312 on both alleles (Figure 6E). To quantitatively analyze these observations, we established an

313 automated image-based speckle/filament recognition and computation (Figure S5B in the  
314 supplement). Whereas LZTR1<sup>WT</sup> displayed a mean speckle size of 0.9  $\mu\text{m}$ , the mean filament  
315 length per cell in LZTR1<sup>L580P</sup> amounted to 7.9  $\mu\text{m}$  (Figure 6F). In line, co-expression of mutant  
316 and WT constructs, and vice versa, normalized the speckle size to 1.2  $\mu\text{m}$  and 1.3  $\mu\text{m}$ ,  
317 respectively.

318 These data provide evidence that the missense variant *LZTR1*<sup>L580P</sup> induces a unique  
319 polymerization of LZTR1-cullin 3 ubiquitin ligase complexes, which subsequently  
320 compromises the proper function of the ubiquitination machinery.

321

### 322 *Homozygous LZTR1*<sup>L580P</sup> alters binding affinities of dimerization domains

323 Based on previous studies, proteins from the BTB-BACK-Kelch domain family including  
324 LZTR1 are predicted to assemble in homo-dimers.<sup>9,28,29</sup> However, our current knowledge  
325 regarding the exact domains responsible for LZTR1 dimerization is limited. In order to identify  
326 a plausible explanation for the *LZTR1*<sup>L580P</sup>-induced polymerization, we utilized ColabFold – an  
327 AlphaFold-based platform for the prediction of protein structures and homo- and heteromer  
328 complexes.<sup>30</sup> We used a homo-trimer configuration of the experimentally employed *LZTR1*  
329 variants (all within the BACK1 domain) and AlphaFold-multimer predicted five high-quality  
330 models each with an average predicted local distance difference test (a per-residue confidence  
331 metric) between 64.1 and 76.0. For all variants, we inspected the interaction between the chains  
332 through the predicted alignment error (PAE) generated by AlphaFold-multimer (Figure S6 in  
333 the supplement). Here, a low PAE indicates that the relative position and orientation of the  
334 positions x and y was correctly predicted – a measure indicating if interfacing residues were  
335 correctly predicted across chains. Based on these predictions, we compared the top-ranked  
336 models of each variant according to the predicted template modeling score, which corresponded

337 to overall topological accuracy (Figure 7A). The top-ranked model for LZTR1<sup>WT</sup> showed  
338 interaction as a homo-dimer via the BACK2-BACK2 domain, whereas the third LZTR1 protein  
339 remained monomeric. We also observed the identical dimerization via the BACK2 domains for  
340 all other variants, except for LZTR1<sup>L580P</sup> (Figure S6 in the supplement). In contrast, the top-  
341 ranked model for LZTR1<sup>L580P</sup> predicted an interaction between all three chains, on the one hand  
342 via the BACK2-BACK2 domain and on the other hand via the BACK1-BACK1 domain (Figure  
343 7A). In addition, we used AlphaFold-multimer to predict the interaction of LZTR1<sup>L580P</sup> with  
344 the substrate MRAS and the ubiquitin ligase cullin 3 (Figure 7B). Within the multiprotein  
345 complex, MRAS was predicted to bind to the Kelch domain, whereas cullin 3 was predicted to  
346 interact with the BTB1-BTB2 domain of LZTR1.

347 To experimentally confirm the formation of LZTR1<sup>L580P</sup> polymers, we produced soluble  
348 recombinant proteins of LZTR1<sup>WT</sup> and LZTR1<sup>L580P</sup> and analyzed the purified samples by  
349 analytical size exclusion chromatography, allowing to characterize the molecular masses of  
350 proteins and protein complexes (Figure 7C). A higher order oligomerization profile was  
351 observed for LZTR1<sup>L580P</sup>, whereas LZTR1<sup>WT</sup> exhibited a less complex elution profile (Figure  
352 7D). Immunoblotting of the fractions showed that LZTR1<sup>L580P</sup> eluted as a hexamer with a  
353 molecular weight of approximately 700 kDa, as a tetramer corresponding to 450-550 kDa, and  
354 as a dimer/monomer with a molecular weight of 100-200 kDa (Figure 7E). In contrast,  
355 LZTR1<sup>WT</sup> was characterized by a single peak, indicative of its predominantly  
356 dimeric/monomeric state. In addition, we examined the interaction of LZTR1<sup>WT</sup> and  
357 LZTR1<sup>L580P</sup> proteins with RIT1 and MRAS in their inactive (GDP-bound) and active  
358 (GppNHp-bound; GppNHp is a non-hydrolyzable GTP-analog) states. Both LZTR1<sup>WT</sup> and  
359 mutant LZTR1<sup>L580P</sup> were capable of binding their substrates in both nucleotide-bound states  
360 (Figure 7F).



361 Collectively, the *in silico* predictions and molecular analyses suggest that the missense variant  
362 *LZTR1*<sup>L580P</sup> alters the binding affinities of the BACK1 domain enabling formation of linear  
363 LZTR1 polymer chains via both dimerization domains, thereby providing a rationale for the  
364 molecular and cellular impairments in NS (Figure 7G).

365

366 *Homozygous LZTR1*<sup>L580P</sup> *preserves residual function of ubiquitin ligase complex*

367 To investigate how severely the degradation of RAS GTPases is affected by the missense  
368 variant *LZTR1*<sup>L580P</sup> and the polymerization of LZTR1 complexes (especially compared to the  
369 complete loss of LZTR1), we treated the patient-specific iPSC-CMs, the CRISPR-corrected  
370 cells, the *LZTR1*<sup>KO</sup> cells, and the WT controls with the cullin RING ligase inhibitor  
371 pevonedistat (which blocks the ubiquitin-mediated degradation via the proteasome and the  
372 autophagosome) or the proteasome inhibitor MG-132 and analyzed MRAS and RIT1 protein  
373 levels three days after treatment (Figure 8A,B). As expected, inhibition of cullin-mediated  
374 ubiquitination by pevonedistat increased MRAS and RIT1 protein levels in WT and CRISPR-  
375 corrected iPSC-CMs (Figure 8C-E). Treatment in patient-specific *LZTR1*<sup>L580P</sup> cultures further  
376 increased the RAS GTPase levels, indicating residual function of the *LZTR1*<sup>L580P</sup>-cullin 3  
377 ubiquitin ligase complex. Interestingly, while MRAS accumulation in *LZTR1*<sup>KO</sup> cultures could  
378 not be further increased by cullin inhibition, RIT1 protein levels were significantly higher after  
379 treatment in *LZTR1*-deficient cells. This suggests that MRAS is exclusively targeted for  
380 degradation by the LZTR1-cullin 3 ubiquitin ligase complex, whereas RIT1 can be additionally  
381 degraded in an *LZTR1*-independent manner. Furthermore, inhibition of the ubiquitin-  
382 proteasome system resulted in increased RIT1 levels, suggesting that RIT1 is predominantly  
383 degraded by the proteasomal pathway (Figure 8F-H). In contrast, MRAS levels were not  
384 affected after treatment across all iPSC lines, indicating exclusive autophagosomal degradation  
385 of MRAS.



386 These data confirm that the missense variant *LZTR1*<sup>L580P</sup> preserves some residual function of  
387 the LZTR1-cullin 3 ubiquitin ligase complex compared to the complete loss of *LZTR1*.  
388 Furthermore, the results demonstrate that degradation of cardiomyocyte-specific MRAS is  
389 exclusively mediated by LZTR1 via the autophagosome, whereas proteasomal degradation of  
390 RIT1 is mediated by both *LZTR1*-dependent and *LZTR1*-independent pathways.

391

## 392 **Discussion**

393 Both autosomal dominant and autosomal recessive forms of *LZTR1*-associated NS have been  
394 described presenting with a broad clinical spectrum and various phenotypic expression of  
395 symptoms. However, the mechanistic consequences of numerous of these mutations, mostly  
396 classified as variants of uncertain significance, are still under debate. In previous studies, we  
397 and others elucidated the role of LZTR1 as a critical negative regulator of the RAS-MAPK  
398 pathway by controlling the pool of RAS GTPases.<sup>8-10,28,31</sup> By using patient-derived iPSC-CMs  
399 from NS patients with biallelic truncating *LZTR1* variants, we could show that *LZTR1*  
400 deficiency results in accumulation of RAS levels, signaling hyperactivity, and cardiomyocyte  
401 hypertrophy.<sup>10</sup> Further, by genetically correcting one of the two affected alleles, we could show  
402 that one functional *LZTR1* allele is sufficient to maintain normal RAS-MAPK activity in cardiac  
403 cells. In contrast to the truncating variants, dominant *LZTR1* missense variants generally cluster  
404 in the Kelch motif. Based on heterologous expression systems, these dominant variants are  
405 considered to perturb recognition or binding of RAS substrates to the LZTR1 ubiquitination  
406 complex.<sup>8,9,11,31</sup> Much less is known about the functional relevance of recessive *LZTR1*  
407 missense variants, which are distributed over the entire protein. Detailed insights in the  
408 underlying molecular and functional mechanisms of selective variants causing the severe  
409 cardiac phenotype in NS enable to gain insights into specific structure-function relations of  
410 LZTR1 and are crucial to facilitate the development of patient-specific therapies.

411 In this study, we diagnosed a patient with NS, who presented typical clinical features of NS  
412 including an early-onset HCM and confirmed this diagnosis on genetic level by the  
413 identification of the homozygous, causative variant c.1739T>C/p.L580P in *LZTR1* by whole  
414 exome sequencing. The variant is novel and was not described before in patients with NS and  
415 we classified *LZTR1*<sup>L580P</sup> as likely causative based on its absence in gnomAD and our  
416 computational prediction. Besides the *LZTR1* variant, no additional variants were detected in  
417 other NS-associated genes or novel RAS-associated candidate genes. By combining *in vitro*  
418 disease modeling using patient-specific and CRISPR/Cas9-corrected iPSC-CMs, with  
419 molecular and cellular phenotyping, as well as *in silico* structural modeling, we uncovered a  
420 unique *LZTR1*<sup>L580P</sup>-specific disease mechanism provoking the cardiac pathology of NS. In  
421 detail, we found that a) *LZTR1*<sup>L580P</sup> is predicted to alter the binding affinity of the BACK1  
422 dimerization domain facilitating the formation of linear LZTR1 protein chains; b) homozygous  
423 *LZTR1*<sup>L580P</sup> fosters the assembly of large polymers of LZTR1-cullin 3 ubiquitin ligase  
424 complexes; c) pathological polymerization results in LZTR1 complex dysfunction, disturbed  
425 ubiquitination, accumulation of RAS GTPases, and RAS-MAPK signaling hyperactivity; and  
426 d) increased signaling activity induces global changes of the proteomic landscape ultimately  
427 causing cellular hypertrophy. Importantly, correction of one allele – in line with co-expression  
428 of WT and mutant *LZTR1* transcripts – is sufficient to normalize the cardiac disease phenotype  
429 both on molecular and cellular level.

430 Based on recent publications, there is a broad consensus about the role of LZTR1 as an adaptor  
431 protein for the cullin 3 ubiquitin ligase complex targeting RAS proteins for ubiquitination and  
432 subsequent protein degradation.<sup>8–11,28,31</sup> In line with observations in other NS-associated genes  
433 and mutations, LZTR1 dysfunction and concomitant accumulation of RAS GTPases results in  
434 hyperactivation of RAS-MAPK signaling. We confirmed robustly elevated RAS levels in  
435 patient-specific cells harboring the homozygous *LZTR1*<sup>L580P</sup> missense variant. However, the

436 accumulation of RAS GTPases and ERK hyperactivity was substantially higher in LZTR1<sup>KO</sup>  
437 cells, supporting a partial residual function of LZTR1<sup>L580P</sup> ubiquitin ligase complexes.  
438 Furthermore, it remains controversial, whether LZTR1 is able to recognize all members of the  
439 RAS GTPase family for degradation or whether there is a selective affinity towards particular  
440 RAS members. By using heterologous expression systems, LZTR1 interaction with the main  
441 highly conserved RAS proteins HRAS, KRAS and NRAS was observed.<sup>8,28,31</sup> On the contrary,  
442 Castel and colleagues observed a selective binding of LZTR1 with RIT1 and MRAS, but not  
443 with HRAS, KRAS or NRAS.<sup>9</sup> Moreover, in homozygous *LZTR1* knockout mice elevated RIT1  
444 protein levels were detected across different organs including brain, liver, and heart, whereas  
445 HRAS, KRAS, and NRAS levels (recognized by pan-RAS) remained unchanged.<sup>32</sup> By using  
446 global proteomics, we now provide further evidence that LZTR1 dysfunction in  
447 cardiomyocytes in particular causes severe accumulation of MRAS and RIT1 and, to a lower  
448 extent, upregulation of the other RAS GTPases HRAS, KRAS and NRAS, although all RAS  
449 proteins are robustly expressed in this cell type. We conclude that based on gene expression  
450 data and overall protein levels, MRAS seems to be the most prominent RAS candidate in  
451 cardiomyocytes driving the signaling hyperactivity in these cells. In addition, our inhibition  
452 experiments demonstrate that MRAS degradation is exclusively mediated by LZTR1 via the  
453 autophagosome, whereas RIT1 degradation is mediated by both LZTR1-dependent and  
454 LZTR1-independent pathways. These observations suggest that at endogenous expression  
455 levels, LZTR1 possesses a certain selectivity for MRAS and RIT1, and a lower affinity for the  
456 RAS GTPases HRAS, KRAS and NRAS. However, we cannot exclude the possibility of cell  
457 type-specific differences in LZTR1-RAS binding affinities.

458 Besides accumulation of RAS members, HSPA2 was strongly upregulated in *LZTR1*-deficient  
459 iPSC-CMs both on transcriptional as well as on protein level, suggesting that HSPA2 is not a  
460 direct substrate of LZTR1. In line, severely increased HSPA2 levels had been observed by us

461 in NS iPSC-CMs with *LZTR1*-truncating variants,<sup>10</sup> in a *RAF1*-related NS iPSC-CM model,<sup>15</sup>  
462 as well as in iPSC-CMs from Fabry disease patients, a lysosomal storage disorder associated  
463 with cardiac involvement such as HCM and arrhythmias.<sup>33</sup> Moreover, a significant  
464 cardiomyocyte-specific elevation of HSPA2 was also observed in HCM tissue from  
465 patients.<sup>34,35</sup> A heat shock protein 70-based therapy has been shown to reverse lysosomal  
466 pathology,<sup>36</sup> whereas deletion of these gene members was assumed to induce cardiac  
467 dysfunction and development of cardiac hypertrophy.<sup>37</sup> As a member of the large group of  
468 chaperones, HSPA2 is known to have a dual function in cells: to mediate disaggregation and  
469 refolding of misfolded proteins as well as to assist in protein degradation via the ubiquitin-  
470 proteasome system or the lysosome-mediated autophagy.<sup>38,39</sup> This suggests that HSPA2  
471 upregulation may be a cardio-protective adaptive response of the hypertrophic cardiomyocytes  
472 to cope with *LZTR1*<sup>L580P</sup>-induced RAS accumulation (and possibly LZTR1 polymerization), by  
473 regulating the quality control mechanisms for protein degradation.

474 Major hallmarks of pathological cardiac hypertrophy include impaired cardiac function,  
475 changes in extracellular matrix composition, and fibrosis, as well as metabolic reprogramming  
476 and mitochondrial dysfunction.<sup>40</sup> In accordance, the proteomic disease signature of patient-  
477 derived iPSC-CM cultures revealed impairments in muscle contraction, extracellular matrix  
478 organization, and metabolism, all crucial for proper cardiomyocyte function. Furthermore,  
479 *LZTR1*<sup>L580P</sup>-derived iPSC-CMs recapitulated the patient's hypertrophic phenotype reflected by  
480 cellular enlargement. Strikingly, both the molecular profile as well as cellular hypertrophy were  
481 resolved upon CRISPR-correction of the missense variant. Interestingly, no myofibrillar  
482 disarray was observed in our cell model. However, the presence of myofibril disarray in NS  
483 remains controversial: whereas structural defects were described in *RAF1*-associated iPSC  
484 models,<sup>15,41</sup> we and others did not observe any impact on sarcomere structures or myofibril  
485 organization in *LZTR1*-related, *PTPN11*-related, and *BRAF*-related iPSC-CMs,<sup>10,14,16</sup> implying

486 potential genotype-dependent differences in the manifestation of myofibril disassembly in NS.  
487 Missense variants in *LZTR1* located within the Kelch domain are predicted to affect substrate  
488 recognition, whereas missense variants in the BTB-BACK domain are assumed to impair either  
489 binding of cullin 3, proper homo-dimerization, or correct subcellular localization. Several  
490 studies could provide proof that dominantly acting Kelch domain variants perturb recognition  
491 of RAS substrates, but do not affect LZTR1 complex stability or subcellular  
492 localization.<sup>8,9,11,31,42</sup> Vice versa, BTB-BACK missense variants showed no influence on RIT1  
493 binding.<sup>9,42</sup> However, variants located in the BTB1 or the BTB2 domain, such as *LZTR1*<sup>V456G</sup>,  
494 *LZTR1*<sup>R466Q</sup>, *LZTR1*<sup>P520L</sup>, and *LZTR1*<sup>R688C</sup>, caused a subcellular mislocalization from defined  
495 speckles to a diffuse cytoplasmic distribution, similar to the findings obtained from truncating  
496 *LZTR1* variants.<sup>8,31</sup> In addition to these distinct pathological consequences from different  
497 variants analyzed so far, we now provide evidence for an alternative disease mechanism unique  
498 to BACK1 domain-located *LZTR1*<sup>L580P</sup>: ectopic expression of *LZTR1*<sup>L580P</sup> in iPSC-CMs caused  
499 a pathological polymerization of LZTR1 ubiquitination complexes. This phenomenon was  
500 verified by *in silico* prediction and chromatography with purified recombinant LZTR1 proteins.  
501 In contrast, the binding probabilities of *LZTR1*<sup>L580P</sup> to substrates and interaction partners were  
502 not significantly affected by the mutation. This remarkable phenotype was not observed for any  
503 other variant within the BACK1 domain. Notably, ectopic co-expression of *LZTR1*<sup>L580P</sup> and  
504 *LZTR1*<sup>WT</sup> alleviated the polymerization, indicating that the assembly of LZTR1 polymer chains  
505 exclusively occurs if the mutated proteins are present in homozygous state. Strikingly, an  
506 oligomerization of another BTB-BACK family member had been reported previously: Marzahn  
507 and colleagues revealed that dimers from the cullin 3 ubiquitin ligase substrate adaptor SPOP  
508 (harboring only one BTB-BACK domain) self-associate into linear higher-order oligomers via  
509 BACK domain dimerization.<sup>43</sup> These SPOP oligomers assembled in membrane-less cellular  
510 bodies, visualized as nuclear speckles, and it was proposed that the speckles might be important

511 hotspots of ubiquitination. Based on these findings and our data, we propose that LZTR1  
512 complexes concentrate in cellular speckles (either as dimers or as oligomers) to form subcellular  
513 clusters for efficient ubiquitination and degradation of RAS proteins. However, *LZTR1<sup>L580P</sup>*-  
514 induced polymerization of these complexes compromises regular function, leading to  
515 accumulation of substrates. The CRISPR-based correction was able to rescue the  
516 polymerization phenotype and may be a sustainable treatment option in the future.  
517 Alternatively, it may be possible to identify compounds that specifically prevent the interaction  
518 of LZTR1 complexes via BACK1-BACK1 dimerization.

519 Our knowledge about the particular domains responsible for LZTR1 homo-dimerization is still  
520 incomplete. Whereas Castel and colleagues proposed that the BTB1 and the BACK1 domain  
521 are required for dimerization,<sup>9</sup> Steklov et al. observed impaired assembly in a BACK2 domain  
522 mutated *LZTR1* variant.<sup>31</sup> Based on *in silico* modeling, we now propose that LZTR1 can  
523 dimerize either via the BACK2-BACK2 domains or via the BACK1-BACK1 domains.  
524 Although in *LZTR1<sup>WT</sup>* the BACK2-BACK2 dimerization might be primarily utilized, changes  
525 in binding affinities of the BACK1 domain as a consequence of *LZTR1<sup>L580P</sup>* facilitated tandem  
526 self-association of dimers to linear multimers. Strikingly, the *in silico* models for complex  
527 assembly of the different variants were consistent with the experimental data. However, this  
528 analysis must be taken with caution as the PAE signal across chains is overall weak and  
529 AlphaFold-multimer was not trained with single point variants in mind. Of note,  
530 dimer/monomer as well as trimer interactions (in diverse combinations, such as via BACK2-  
531 BACK2 and BACK1-BACK1 or via BACK2-BACK2-BACK2) had also been predicted for the  
532 other BACK1 variants as well as for WT in the lower-ranked models (Figure S6 in the  
533 supplement). As a next step, it would be interesting to see, if the trend stays consistent for  
534 complexes with more chains. However, due to technical prerequisites, we were currently not  
535 able to predict more than three chains.

536 So far, the relevance of certain *LZTR1* missense variants on the molecular and cellular processes  
537 had been investigated in heterologous expression systems, failing to faithfully represent human  
538 cardiac physiology. Our study demonstrates the potential of patient-specific iPSCs to model  
539 human diseases and to uncover variant-specific pathomechanisms, which might facilitate the  
540 development for early and more precise therapies. Despite the great advantages of this model  
541 system over other cellular models, iPSC-CMs possess certain limitations. As summarized by  
542 several reports, iPSC-CMs are considered to be developmentally immature characterized by  
543 molecular and functional properties similar to fetal CMs.<sup>25,44,45</sup> Although we complemented our  
544 study by utilizing three-dimensional EHMs, these *in vitro* models are currently not able to  
545 entirely resemble the disease phenotype at organ level. Nevertheless, our investigations at  
546 single cell and tissue level have proven to be a valuable platform for uncovering disease-  
547 relevant signaling pathways, identifying novel therapeutic targets and studying the disease  
548 progression during cardiogenesis.

549 Taken together, this study uncovered a novel mechanism causing recessive NS, which is  
550 initiated by *LZTR1*<sup>L580P</sup>-driven polymerization of LZTR1 ubiquitination complexes, provoking  
551 molecular and cellular impairments associated with cardiac hypertrophy. Moreover, CRISPR-  
552 correction of the missense variant on one allele was sufficient to rescue the phenotype, thereby  
553 providing proof-of-concept for a sustainable therapeutic approach.

554

## 555 **Materials and methods**

### 556 *Ethical approval*

557 The study was approved by the Ethics Committee of the University Medical Center Göttingen  
558 (approval number: 10/9/15) and carried out in accordance with the approved guidelines. Written



559 informed consent was obtained from all participants or their legal representatives prior to the  
560 participation in the study.

561

#### 562 *Whole exome sequencing*

563 Whole exome sequencing on genomic DNA of the patient was performed using the SureSelect  
564 Human All Exon V6 kit (Agilent) on an Illumina HiSeq 4000 sequencer. The “Varbank 2.0”  
565 pipeline of the Cologne Center for Genomics (CCG) was used to analyze and interpret the  
566 exome data, as previously described.<sup>10</sup> Co-segregation analysis was performed in the family.  
567 Computational predictions for the pathogenicity of the variant were performed using  
568 MutationTaster (<https://www.mutationtaster.org/>), SIFT (<https://sift.bii.a-star.edu.sg/>), and  
569 PolyPhen-2 (<http://genetics.bwh.harvard.edu/pph2/>).

570

#### 571 *Generation and culture of human iPSCs*

572 Human iPSC lines from two healthy donors, from one NS patient with biallelic truncating  
573 variants in *LZTR1* (NM\_006767.4: c.27dupG/p.Q10Afs\*24, c.1943-256C>T/p.T648fs\*36),  
574 from one NS patient with a pathological missense variant in *LZTR1* (NM\_006767.4:  
575 c.1739T>C/p.L580P; ClinVar: RCV000677201.1), as well as heterozygous and homozygous  
576 CRISPR/Cas9-corrected iPSC lines were used in this study. Wild type iPSC lines UMGi014-C  
577 clone 14 (isWT1.14, here abbreviated as WT1) and UMGi130-A clone 8 (isWT11.8, here  
578 abbreviated as WT11) were generated from dermal fibroblasts and peripheral blood  
579 mononuclear cells from two male donors, respectively, using the integration-free Sendai virus  
580 and described previously.<sup>46,47</sup> Patient-specific iPSC line UMGi030-A clone 14 (isHOcMx1.14,  
581 here abbreviated as LZTR1<sup>KO</sup>) was generated from patient’s dermal fibroblasts using the  
582 integration-free Sendai virus and described previously.<sup>10</sup> Patient-specific iPSC line UMGi137-



583 A clone 2 (isNoonSf1.2, here abbreviated as LZTR1<sup>L580P</sup>) was generated from patient's dermal  
584 fibroblasts using the integration-free Sendai virus according manufacturer's instructions with  
585 modifications, as previously described.<sup>10</sup> Genetic correction of the pathological gene variant in  
586 the patient-derived iPSC line UMGi137-A clone 2 was performed using ribonucleoprotein-  
587 based CRISPR/Cas9 using crRNA/tracrRNA and Hifi SpCas9 (IDT DNA technologies) by  
588 targeting exon 15 of the *LZTR1* gene, as previously described.<sup>10</sup> The guide RNA target sequence  
589 was (PAM in bold): 5'-GCGGCACTCTCGCACACAAC **CGG**-3'. For homology-directed  
590 repair, a single-stranded oligonucleotide with 45-bp homology arms was used. After automated  
591 clonal singularization using the single cell dispenser CellenOne (Cellenion/Scienion) in  
592 StemFlex medium (Thermo Fisher Scientific), successful genome editing was identified by  
593 Sanger sequencing and the CRISPR-corrected isogenic iPSC lines UMGi137-A-1 clone D8  
594 (isNoonSf1-corr.D8, here abbreviated as L580P<sup>corr-het</sup>) and UMGi137-A-1 clone D1  
595 (isNoonSf1-corr.D1, here abbreviated as L580P<sup>corr-hom</sup>) were established. Newly generated  
596 iPSC lines were maintained on Matrigel-coated (growth factor reduced, BD Biosciences) plates,  
597 passaged every 4-6 days with Versene solution (Thermo Fisher Scientific) and cultured in  
598 StemMACS iPS-Brew XF medium (Miltenyi Biotec) supplemented with 2  $\mu$ M Thiazovivin  
599 (Merck Millipore) on the first day after passaging with daily medium change for at least ten  
600 passages before being used for molecular karyotyping, pluripotency characterization, and  
601 differentiation experiments. Pluripotency analysis via immunocytochemistry and flow  
602 cytometry was performed, as previously described.<sup>10</sup> For molecular karyotyping, genomic DNA  
603 of iPSC clones was sent for genome-wide analysis via Illumina BeadArray (Life&Brain,  
604 Germany). Digital karyotypes were analyzed in GenomeStudio v2.0 software (Illumina). For  
605 off-target screening, the top five predicted off-target regions for the respective guide RNA  
606 ranked by the CFD off-target score using CRISPOR<sup>48</sup> were analyzed by Sanger sequencing.  
607 Human iPSCs and iPSC-derivatives were cultured in feeder-free and serum-free culture

608 conditions in a humidified incubator at 37°C and 5% CO<sub>2</sub>. All antibodies used for  
609 immunofluorescence and flow cytometry are listed in Table S2 in the supplement.

610

### 611 *Cardiomyocyte differentiation of iPSCs and generation of engineered heart muscle*

612 Human iPSC lines were differentiated into ventricular iPSC-CMs via WNT signaling  
613 modulation and subsequent metabolic selection, as previously described,<sup>19</sup> and cultivated in  
614 feeder-free and serum-free culture conditions until day 60 post-differentiation before being used  
615 for molecular and cellular experiments. Defined, serum-free EHM were generated from iPSC-  
616 CMs around day 30 of differentiation and human foreskin fibroblasts (ATCC) at a 70:30 ratio  
617 according to previously published protocols.<sup>26</sup> Optical analysis of contractility and rhythm of  
618 spontaneously beating EHM in a 48 well plate (myrPlate TM5, myriamed GmbH) was  
619 performed between day 34 and day 42 of culture using a custom-built setup with a high-speed  
620 camera by recording the movement of the two UV light-absorbing flexible poles. Contractility  
621 parameters of EHM recordings of at least 1 min recording time were analyzed via a custom-  
622 build script in MatLab (MathWorks). For each iPSC line, three individual differentiations were  
623 used for EHM casting.

624

### 625 *Biosensor-based analysis of ERK signaling dynamics in iPSC-CMs*

626 In brief, the ERK kinase translocation reporter (ERK-KTR) biosensor consists of an ERK-  
627 specific docking site, a nuclear localization signal (NLS), a nuclear export signal (NES), and  
628 mClover. Endogenous, phosphorylated ERK binds to the biosensor and phosphorylates its NLS  
629 and NES resulting in a nucleus-cytoplasm shuttling according to ERK activity.<sup>20</sup> ERK-KTR  
630 biosensor encoding lentiviral particles were produced in HEK293T cells transfected with  
631 transfer, envelope, and packaging plasmids using Lipofectamine 3000 (Thermo Fisher

632 Scientific) according to manufacturer's instructions. pLentiPGK Puro DEST ERKKTRClover  
633 was a gift from Markus Covert (RRID:Addgene\_90227), pMD2.G was a gift from Didier Trono  
634 (RRID:Addgene\_12259), and psPAX2 was a gift from Didier Trono (RRID:Addgene\_12260).  
635 Virus was harvested from day 2 to day 5 post-transfection by medium collection and  
636 centrifugation at 500×g at 4°C for 5 min. The harvested virus was filtered using a 0.45 µm filter  
637 and a syringe. For transduction, 15,000 iPSC-CMs were seeded per well of a 96-well plate and  
638 lentiviral transduction was performed 7 days after cell digestion. Lentivirus was diluted in  
639 culture medium supplemented with 100 U/ml penicillin, 100 µg/ml streptomycin (Thermo  
640 Fisher Scientific), and 10 µg/ml Polybrene Transfection Reagent (Merck). After 24 h of  
641 incubation, medium was replaced with cardio culture medium and cells were maintained for  
642 additional 7 days. For live-cell imaging, biosensor-transduced iPSC-CM cultures at day 60 of  
643 differentiation were treated with 100 nM MEK inhibitor trametinib (Selleck Chemicals),  
644 100 nM JNK inhibitor JNK-IN-8 (Hycultec), or 1:1,000 DMSO (Sigma-Aldrich) for 60 min,  
645 before stimulation with 10% fetal bovine serum for another 60 min. Cells were imaged every  
646 10 min for a total time of 120 min. Live cell imaging experiments were acquired using the CQ1  
647 confocal image cytometer (Yokogawa Electric Corporation) and CellPathfinder software  
648 (Yokogawa Electric Corporation) under environmental control (37°C, 5% CO<sub>2</sub>). Exported  
649 images were processed using the StarDist method for nucleus segmentation.<sup>49</sup> The StarDist  
650 network was retrained on 60 images from our dataset with annotations manually produced with  
651 napari.<sup>50</sup> For a new image, the nuclei were then segmented with StarDist, and a ring element  
652 around each nucleus was computed to approximate the cytosol. The mean fluorescence intensity  
653 of both compartments was measured for each cell individually.

654

655 *Proteomics and Western blot analysis of iPSC-CMs*

656 For proteomic analysis, iPSC-CMs were pelleted at day 60 of differentiation by scratching in  
657 RIPA buffer (Thermo Fisher Scientific) containing phosphatase and protease inhibitor (Thermo  
658 Fisher Scientific) and snap-frozen in liquid nitrogen. Cell pellets were reconstituted in 8 M urea/  
659 2 M thiourea solution (Sigma-Aldrich) and lysed by five freeze-thaw cycles at 30°C and  
660 1.600 rpm. Protein containing supernatant was collected by centrifugation. Nucleic acid was  
661 degraded enzymatically with 0.125 U/μg benzonase (Sigma-Aldrich), and protein  
662 concentration was determined by Bradford assay (Bio-Rad). Five μg protein was processed for  
663 LC-MS/MS analysis, as previously described.<sup>51</sup> Briefly, protein was reduced (2.5 mM  
664 dithiothreitol, Sigma-Aldrich; 30 min at 37°C) and alkylated (10 mM iodacetamide, Sigma-  
665 Aldrich; 15 min at 37°C) before proteolytic digestion with LysC (enzyme to protein ratio 1:100,  
666 Promega) for 3 h and with trypsin (1:25, Promega) for 16 h both at 37°C. The reaction was  
667 stopped with 1% acetic acid (Sigma-Aldrich), and the peptide mixtures were desalted on C-18  
668 reverse phase material (ZipTip μ-C18, Millipore). Eluted peptides were concentrated by  
669 evaporation under vacuum and subsequently resolved in 0.1% acetic acid / 2% acetonitrile  
670 containing HRM/iRT peptides (Biognosys) according to manufacturer's recommendation. LC-  
671 MS/MS analysis was performed in data-independent acquisition (DIA) mode using an Ultimate  
672 3000 UPLC system coupled to an Exploris 480 mass spectrometer (Thermo Scientific).  
673 Peptides were separated on a 25 cm Accucore column (75 μm inner diameter, 2.6 μm, 150 Å,  
674 C18) at a flow rate of 300 nl/min in a linear gradient for 60 min. Spectronaut software  
675 (Biognosys) was used for the analysis of mass spectrometric raw data. For peptide and protein  
676 identification, the Direct DIA approach based on UniProt database limited to human entries  
677 was applied. Carbamidomethylation at cysteine was set as static modification, oxidation at  
678 methionine and protein N-terminal acetylation were defined as variable modifications, and up  
679 to two missed cleavages were allowed. Ion values were parsed when at least 20% of the samples  
680 contained high quality measured values. Peptides were assigned to protein groups and protein

681 inference was resolved by the automatic workflow implemented in Spectronaut. Statistical data  
682 analysis was conducted using an in-house developed R tool and based on median-normalized  
683 ion peak area intensities. Methionine oxidized peptides were removed before quantification.  
684 Differential abundant proteins ( $p\text{-value} \leq 0.05$ ) were identified by the algorithm ROPECA<sup>52</sup>  
685 and application of the reproducibility-optimized peptide change averaging approach<sup>53</sup> applied  
686 on peptide level. Only proteins quantified by at least two peptides were considered for further  
687 analysis. Reactome pathway enrichment analysis was performed using the ClueGo plugin in  
688 Cytoscape.<sup>54</sup> For each iPSC line, at least three individual differentiations were analyzed. For  
689 Western blot analysis, protein containing supernatant was collected by centrifugation. Protein  
690 concentration was determined by BCA assay (Thermo Fisher Scientific). Samples were  
691 denatured at 95°C for 5 min. 15  $\mu\text{g}$  protein were loaded onto a 4-15% Mini-PROTEAN TGX  
692 Stain-Free precast gel (Bio-Rad). The protein was separated by sodium dodecyl sulfate-  
693 polyacrylamide gel electrophoresis (SDS-PAGE) by applying 200 V for 30 min. Post-running,  
694 TGX gels were activated via UV light application using the Trans-Blot Turbo transfer system  
695 (Bio-Rad). While blotting, proteins were transferred to a nitrocellulose membrane (25 V  
696 constant, 1.3 A for 7 min). Total protein amount was detected via the ChemiDoc XRS+ (Bio-  
697 Rad) system and used for protein normalization. After 1 h in blocking solution (5% milk in  
698 TBS-T, Sigma-Aldrich), membranes were incubated in primary antibody solution (1% milk in  
699 TBS-T) overnight. Membrane was washed trice with TBS-T before applying the secondary  
700 antibody (1:10,000 in 1% milk in TBS-T) at RT for 1 h. After washing, signals were detected  
701 upon application of SuperSignal West Femto Maximum Sensitivity Substrat (Thermo Fisher  
702 Scientific). Image acquisition was performed with the ChemiDoc XRS+ (Bio-Rad) at the high-  
703 resolution mode. For protein quantification, ImageLab (Bio-Rad) was used and protein levels  
704 were first normalized to total protein and second to the corresponding WT samples on each  
705 blot. For ERK signaling analysis, iPSC-CMs at day 60 of differentiation were treated with

706 10 nM trametinib (Selleck Chemicals) for 30 min and stimulated with 10% fetal bovine serum  
707 (Thermo Fisher Scientific). For analysis of degradation pathways, iPSC-CMs at day 60 of  
708 differentiation were treated with 1-2  $\mu$ M pevonedistat (Hycultec) or 750 ng MG-132  
709 (InvivoGen) for three days. For each iPSC line, at least three individual  
710 differentiations/conditions were analyzed. All antibodies used for Western blot are listed in  
711 Table S2 in the supplement.

712

### 713 *Real-time PCR analysis of iPSC-CMs*

714 Pellets of iPSC-CMs at day 60 of differentiation were snap-frozen in liquid nitrogen and stored  
715 at -80°C. Total RNA was isolated using the NucleoSpin RNA Mini kit (Macherey-Nagel)  
716 according to manufacturer's instructions. 200 ng RNA was used for the first-strand cDNA  
717 synthesis by using the MULV Reverse Transcriptase and Oligo d(T)16 (Thermo Fisher  
718 Scientific). For real-time PCR, cDNA was diluted 1:1 with nuclease-free water (Promega).  
719 Quantitative real-time PCR reactions were carried out using the SYBR Green PCR master mix  
720 and ROX Passive Reference Dye (Bio-Rad) with Micro-Amp Optical 384-well plates, and the  
721 7900HT fast real-time PCR system (Applied Biosystems) according to the manufacturer's  
722 instructions with the following parameters: 95°C for 10 min, followed by 40 cycles at 95°C for  
723 15 s and 60°C for 1 min. Analysis was conducted using the  $\Delta\Delta$ CT method and values were  
724 normalized to *GAPDH* gene expression and to WT controls. Primer sequences are listed in  
725 Table S3 in the supplement.

726

### 727 *Analysis of sarcomere length and myofibril organization of iPSC-CMs*

728 To analyze the sarcomere length and myofibril organization, iPSC-CMs were cultured on  
729 Matrigel-coated coverslips and fixed at day 60 of differentiation in 4% Roti-Histofix (Carl

730 Roth) at RT for 10 min and blocked with 1% Bovine Serum Albumin (BSA; Sigma-Aldrich) in  
731 PBS (Thermo Fisher Scientific) overnight at 4°C. Primary antibodies were applied in 1% BSA  
732 and 0.1% Triton-X100 (Carl Roth) in PBS at 37°C for 1 h or at 4°C overnight. Secondary  
733 antibodies with minimal cross reactivity were administered in 1% BSA in PBS (Thermo Fisher  
734 Scientific) at RT for 1 h. Nuclei were stained with 8.1 μM Hoechst 33342 (Thermo Fisher  
735 Scientific) at RT for 10 min. Samples were mounted in Fluoromount-G (Thermo Fisher  
736 Scientific). Images were collected using the Axio Imager M2 microscopy system (Carl Zeiss)  
737 and Zen 2.3 software. For analysis of the sarcomere length, images with α-actinin staining of  
738 iPSC-CMs were evaluated using the SarcOptiM plugin in ImageJ (National Institutes of  
739 Health).<sup>55</sup> Here, three independent lines along different myofibrils within one cell were selected  
740 to calculate the mean sarcomere length per cell. For each iPSC line, three individual  
741 differentiations with 9-13 images per differentiation and two cells per image were analyzed. To  
742 analyze the myofibril organization, images with α-actinin staining of iPSC-CMs were processed  
743 using the Tubeness and Fast Fourier Transform plugins in ImageJ. Processed images were  
744 radially integrated using the Radial Profile Plot plugin in ImageJ and the relative amplitude of  
745 the first-order peak in the intensity profile as a measure of sarcomere and myofibril regularity  
746 was automatically analyzed using LabChart (ADIstruments). For each iPSC line, three  
747 individual differentiations with 7-11 images per differentiation were analyzed. All antibodies  
748 used for immunofluorescence are listed in Table S2 in the supplement.

749

#### 750 *Analysis of cell size of iPSC-CMs*

751 To study cellular hypertrophy, iPSC-CMs at day 60 of differentiation were analyzed for cell  
752 size in suspension, as previously described.<sup>10</sup> In brief, iPSC-CMs at day 50 of differentiation  
753 were plated at a density of  $2.5 \times 10^5$  cells per well on Matrigel-coated 12-well plates. At day 60  
754 of differentiation, cells were singularized with StemPro Accutase Cell Dissociation Reagent



755 (Thermo Fisher Scientific) and measured for cell diameter using the CASY cell counter system  
756 (OMNI Life Science). Each value represents a mean of  $5 \times 10^2$  to  $1.5 \times 10^4$  cells per measurement.  
757 To exclude cell debris and cell clusters, only values within a diameter range of 15-40  $\mu\text{m}$  were  
758 selected. For each iPSC line, at least three individual differentiations with 3-5 replicates per  
759 differentiation were analyzed. To study the effect of MEK inhibition on LZTR1<sup>L580P</sup> iPSC-  
760 CMs, cultured at a density of  $6 \times 10^5$  cells per well were treated with 10 nM trametinib for 5  
761 days before being measured via the CASY cell counter.

762

### 763 *Video-based contractility analysis of iPSC-CMs*

764 To analyze contractile parameters in monolayer, iPSC-CMs were cultured on Matrigel-coated  
765 6-well plates and measured using the Cytomotion imaging setup (IonOptix). Recordings (60-  
766 75 seconds in duration) were acquired at 250 frames per second. Contractile parameters (beat  
767 frequency, beat regularity, contraction and relaxation time) were analyzed using CytoSolver.

768

### 769 *Ectopic expression of LZTR1 variants in iPSC-CMs*

770 For ectopic expression studies, the human WT *LZTR1* coding sequence was synthesized  
771 (Genewiz/Azenta Life Sciences) and subcloned in *pcDNA3-HA-humanNEMO* (gift from  
772 Kunliang Guan, Addgene plasmid #13512) by exchanging the *NEMO* coding sequence.  
773 Additionally, the HA-tag was exchanged by a FLAG-tag by synthesis of the fragment and  
774 subcloning in *pcDNA3-HA-LZTR1-WT* (Genewiz/Azenta Life Sciences). Patient-specific  
775 mutations were introduced into *pcDNA3-HA-LZTR1-WT* and *pcDNA3-FLAG-LZTR1-WT* using  
776 mutagenesis PCR. Plasmid DNA was isolated via the endotoxin-free NucleoBond Xtra Midi  
777 Plus EF kit (Macherey-Nagel). For transfection, WT1 iPSC-CMs cultured on Matrigel-coated  
778 4-well chamber slides at a density of  $7 \times 10^4$  cells per well were transfected at day 60 of



779 differentiation with the respective plasmids using Lipofectamine Stem Transfection Reagent  
780 (Thermo Fisher Scientific) according to manufacturer's instructions with 700 ng per plasmid.  
781 After 24 h post-transfection, cells were fixed, stained, and imaged as described above. To  
782 quantitatively analyze speckle size and filament length, a custom-build pipeline in CellProfiler  
783 (BROAD institute) was applied. For each *LZTR1* variant, plasmid transfections were performed  
784 in at least three replicates. All antibodies used for immunofluorescence are listed in Table S2  
785 in the supplement. All plasmids used are listed in Table S4 in the supplement.

786

### 787 *Expression and purification of recombinant LZTR1 proteins*

788 *LZTR1*<sup>WT</sup> and *LZTR1*<sup>L580P</sup> were expressed as C-terminal His-tagged proteins in Expi-293F  
789 cells (Thermo Fisher Scientific). pcDNA3.1-LZTR1-Myc-6xHis plasmid was a gift from Jens  
790 Kroll (Heidelberg University and German Cancer Research Center (DKFZ-ZMBH Alliance)).<sup>56</sup>  
791 The *LZTR1*<sup>L580P</sup> variant was introduced into the plasmid by site-directed mutagenesis as  
792 previously described.<sup>11</sup> Cells were transfected using ExpiFectamine 293 Reagent (Thermo  
793 Fisher Scientific) and cultured at a density of 3-5×10<sup>6</sup> cells/ml in a 37°C incubator with ≥80%  
794 relative humidity and 8% CO<sub>2</sub> on an orbital shaker at 125×g for 3-4 days. Expression of the  
795 recombinant *LZTR1* proteins was confirmed by Western blot analysis using an anti-His tag  
796 monoclonal rabbit antibody (Thermo Fisher Scientific). Following confirmation of expression,  
797 cells were harvested and lysed in a buffer containing 50 mM Tris/HCl (pH 7.4), 250 mM NaCl,  
798 5 mM MgCl<sub>2</sub>, 0.5 mM CHAPS, 0.5 mM sodium deoxycholate, 1 mM Na<sub>3</sub>VO<sub>4</sub>, 1 mM NaF, and  
799 5% glycerol, and one complete EDTA-free protease inhibitor mixture tablet (Roche  
800 Diagnostics). The lysates were centrifuged at 20,000×g for 30 min at 4 °C to obtain the soluble  
801 protein fraction containing the expressed *LZTR1* proteins. Soluble fractions were applied to a  
802 Ni-NTA resin column and bound proteins, including *LZTR1* proteins, were eluted with a buffer  
803 containing 50 mM Tris/HCl (pH 7.4), 250 mM NaCl, 5 mM MgCl<sub>2</sub>, 5% glycerol, and 250 mM

804 imidazole. Purified LZTR1 proteins were concentrated using a 30 kDa MWCO concentrator  
805 (Amicon), snap-frozen in liquid nitrogen, and stored at -80°C.

806

807 *Analytical size exclusion chromatography (SEC) of soluble recombinant LZTR1 proteins*

808 Purified LZTR1 proteins were centrifuged at 12,000×g for 10 min before being applied to an  
809 analytical Superose 6 10/300 SEC column (GE Healthcare Life Sciences) using a buffer  
810 containing 50 mM Tris/HCl (pH 7.4), 250 mM NaCl, 5 mM MgCl<sub>2</sub>, 0.5 mM CHAPS, 0.5 mM  
811 sodium deoxycholate, and 5% glycerol at a flow rate of 0.5 ml/min. The column was calibrated  
812 using a kit (GE Healthcare Life Sciences) containing standards of known molecular weight,  
813 including blue dextran (2000 kDa), thyroglobulin (669 kDa), ferritin (440 kDa), aldolase  
814 (158 kDa), and ovalbumin (44 kDa) at their respective concentrations. The proteins were eluted  
815 with the equilibration buffer at a constant flow rate and the absorbance at 260 nm was monitored  
816 with a UV detector. The elution profiles were analyzed using OriginPro 2021 software  
817 (OriginLab) to determine the retention volume and molecular weight of the LZTR1<sup>WT</sup> and  
818 LZTR1<sup>L580P</sup> proteins. To ensure the accuracy of the SEC results, trichloroacetic acid  
819 precipitation of the SEC fractions was performed. The precipitated proteins were visualized by  
820 SDS-PAGE and Western blot analysis using an anti-His tag monoclonal rabbit antibody  
821 (Thermo Fisher Scientific) to determine the protein distribution in each fraction.

822

823 *Pull-down assay for analysis of LZTR1-RAS interactions*

824 Recombinant GST-fused RAS proteins in both inactive (GDP-bound) and active (GppNHp-  
825 bound) states were prepared according to established protocols.<sup>57</sup> In brief, nucleotide and  
826 protein concentrations were determined using HPLC and Bradford reagents, and aliquots were  
827 stored at -80°C. His Mag Sepharose Ni beads (GE Healthcare) were used for the protein-protein

828 interaction assay. Recombinant LZTR1<sup>WT</sup> and LZTR1<sup>L580P</sup> proteins were each mixed with  
829 MRAS and RIT1 proteins in a buffer containing 50 mM Tris/HCl (pH 7.4), 250 mM NaCl,  
830 10 mM MgCl<sub>2</sub>, 20 mM imidazole, and 5% glycerol. Individual protein mixtures were prepared  
831 for each LZTR1 variant and RAS protein combination. Input samples were collected for  
832 analysis, representing the initial protein composition. The remaining volume of each sample  
833 was subjected to pull-down using His Mag Sepharose Ni beads. Mixtures were incubated for  
834 1 h at 4°C to allow for specific protein-protein interactions. After incubation, beads were  
835 thoroughly washed with binding buffer to remove non-specific binding. Protein complexes  
836 were eluted from the beads using a buffer containing 250 mM imidazole. Eluted samples were  
837 analyzed by SDS-PAGE to visualize the separated proteins. To confirm the interactions,  
838 Western blotting was performed using an anti-His tag monoclonal rabbit antibody (Thermo  
839 Fisher Scientific) and GST monoclonal mouse antibody (own antibody). GST control samples  
840 were included in each pull-down experiment to serve as negative controls, assessing the  
841 specificity of observed protein-protein interactions.

842

#### 843 *In silico prediction of protein structures and multimer complexes*

844 Homo-trimer configurations of the different *LZTR1* variants and configurations of LZTR1 with  
845 cullin 3 and MRAS were predicted using ColabFold (version 02c53)<sup>30</sup> and AlphaFold-multimer  
846 v2<sup>58</sup> with 6 recycles and no templates on an A5000 GPU with 24 GBs of RAM and repeated  
847 twice. The five predicted models for each variant were ranked according to the predicted  
848 template modeling score and interactions between the chains were inspected through the  
849 predicted alignment error generated by AlphaFold-multimer.

850

#### 851 *Statistics*

852 Data are presented as the mean  $\pm$  standard error of the mean, unless otherwise specified.  
853 Statistical comparisons were performed using the D'Agostino-Pearson normality test and the  
854 nonparametric Kruskal-Wallis test followed by Dunn correction or the parametric t test in Prism  
855 10 (GraphPad). Results were considered statistically significant when the p-value was  $\leq 0.05$ .

856

#### 857 *Data and biomaterial availability*

858 The mass spectrometry proteomics data have been deposited to the ProteomeXchange  
859 Consortium via the PRIDE partner repository (<https://www.proteomexchange.org/>) with the  
860 identifiers PXD038425 and PXD038417. All human iPSC lines used in this study are deposited  
861 in the stem cell biobank of the University Medical Center Göttingen and are available for  
862 research use upon request.

863

#### 864 **Acknowledgements**

865 We thank Laura Cyganek, Yvonne Hintz, Nadine Gotzmann, Lisa Schreiber, and Yvonne  
866 Wedekind (Stem Cell Unit, University Medical Center Göttingen), Branimir Berečić, Tim  
867 Meyer and Malte Tiburcy (Institute of Pharmacology and Toxicology, University Medical  
868 Center Göttingen), and Anja Wiechert and Manuela Gesell Salazar (Interfaculty Institute of  
869 Genetics and Functional Genomics, University Medicine Greifswald) for excellent technical  
870 assistance.

871 This work was supported by the German Research Foundation (DFG): project number  
872 417880571 to L.C.; project number 501985000 to L.C.; project number 408077919 to I.C.C.;  
873 project number 193793266, Collaborative Research Centre 1002, C04, D01, D02 and S01 to  
874 W.H.Z., G.H., B.W. and L.C.; project number 390729940, Germany's Excellence Strategy -  
875 EXC 2067/1 to A.V.B., G.H., W.H.Z., B.W. and L.C.; by the Else Kröner Fresenius

876 Foundation: project number 2019\_A75 to L.C.; by the German Federal Ministry of Education  
877 and Research (BMBF)/German Center for Cardiovascular Research (DZHK) to E.H., G.H.,  
878 W.H.Z., B.W. and L.C.; by the German Federal Ministry of Education and Research (BMBF):  
879 GeNeRARE project numbers 01GM1902F and 01GM1519D, to I.C.C. and R.A.; and by the  
880 Leducq Foundation: project number 20CVD04 to W.H.Z.

881

#### 882 **Author contributions**

883 L.C. designed the study. L.C. and A.V.B. designed the experiments. A.V.B., O.G.G., E.H.,  
884 F.K., A.M., M.S., C.P., L.B., H.S., M.K., M.E., J.A., F.M., and L.C. performed the experiments  
885 and analyzed the data. I.C.C., G.H., W.H.Z., R.A., and B.W. gave technical support and  
886 conceptual advice. L.C. and A.V.B. wrote and edited the manuscript.

887

#### 888 **Conflict of interest disclosures**

889 The authors declare that they have no conflict of interest.

890 **References**

- 891 1. Roberts AE, Allanson JE, Tartaglia M, Gelb BD. Noonan syndrome. *Lancet*. 2013;381:333–  
892 342. doi: 10.1016/S0140-6736(12)61023-X
- 893 2. Linglart L, Gelb BD. Congenital heart defects in Noonan syndrome: Diagnosis,  
894 management, and treatment. *Am J Med Genet C Semin Med Genet*. 2020;184:73–80. doi:  
895 10.1002/ajmg.c.31765
- 896 3. Hickey EJ, Mehta R, Elmi M, Asoh K, McCrindle BW, Williams WG, Manlhiot C, Benson  
897 L. Survival implications: hypertrophic cardiomyopathy in Noonan syndrome.  
898 Hypertrophic cardiomyopathy in Noonan syndrome. *Congenit Heart Dis*. 2011;6:41–47.  
899 doi: 10.1111/j.1747-0803.2010.00465.x
- 900 4. Wilkinson JD, Lowe AM, Salbert BA, Sleeper LA, Colan SD, Cox GF, Towbin JA, Connuck  
901 DM, Messere JE, Lipshultz SE. Outcomes in children with Noonan syndrome and  
902 hypertrophic cardiomyopathy: a study from the Pediatric Cardiomyopathy Registry. A  
903 study from the Pediatric Cardiomyopathy Registry. *Am Heart J*. 2012;164:442–448. doi:  
904 10.1016/j.ahj.2012.04.018
- 905 5. Aoki Y, Niihori T, Inoue S, Matsubara Y. Recent advances in RASopathies. *J Hum Genet*.  
906 2016;61:33–39. doi: 10.1038/jhg.2015.114
- 907 6. Leoni C, Blandino R, Delogu AB, Rosa G de, Onesimo R, Verusio V, Marino MV, Lanza  
908 GA, Rigante D, Tartaglia M, Zampino G. Genotype-cardiac phenotype correlations in a  
909 large single-center cohort of patients affected by RASopathies: Clinical implications and  
910 literature review. *Am J Med Genet A*. 2022;188:431–445. doi: 10.1002/ajmg.a.62529
- 911 7. Johnston JJ, van der Smagt JJ, Rosenfeld JA, Pagnamenta AT, Alswaid A, Baker EH, Blair  
912 E, Borck G, Brinkmann J, Craigen W, Dung VC, Emrick L, Everman DB, van Gassen KL,  
913 Gulsuner S, Harr MH, Jain M, Kuechler A, Leppig KA, McDonald-McGinn DM, Can

- 914 NTB, Peleg A, Roeder ER, Rogers RC, Sagi-Dain L, Sapp JC, Schäffer AA, Schanze D,  
915 Stewart H, Taylor JC, Verbeek NE, Walkiewicz MA, Zackai EH, Zweier C, Zenker M,  
916 Lee B, Biesecker LG. Autosomal recessive Noonan syndrome associated with biallelic  
917 LZTR1 variants. *Genet Med.* 2018;20:1175–1185. doi: 10.1038/gim.2017.249
- 918 8. Bigenzahn JW, Collu GM, Kartnig F, Pieraks M, Vladimer GI, Heinz LX, Sedlyarov V,  
919 Schischlik F, Fauster A, Rebsamen M, Parapatics K, Blomen VA, Müller AC, Winter GE,  
920 Kralovics R, Brummelkamp TR, Mlodzik M, Superti-Furga G. LZTR1 is a regulator of  
921 RAS ubiquitination and signaling. *Science.* 2018;362:1171–1177. doi:  
922 10.1126/science.aap8210
- 923 9. Castel P, Cheng A, Cuevas-Navarro A, Everman DB, Papageorge AG, Simanshu DK,  
924 Tankka A, Galeas J, Urisman A, McCormick F. RIT1 oncoproteins escape LZTR1-  
925 mediated proteolysis. *Science.* 2019;363:1226–1230. doi: 10.1126/science.aav1444
- 926 10. Hanses U, Kleinsorge M, Roos L, Yigit G, Li Y, Barbarics B, El-Battrawy I, Lan H,  
927 Tiburcy M, Hindmarsh R, Lenz C, Salinas G, Diecke S, Müller C, Adham I, Altmüller J,  
928 Nürnberg P, Paul T, Zimmermann W-H, Hasenfuss G, Wollnik B, Cyganek L. Intronic  
929 CRISPR Repair in a Preclinical Model of Noonan Syndrome-Associated Cardiomyopathy.  
930 *Circulation.* 2020;142:1059–1076. doi: 10.1161/CIRCULATIONAHA.119.044794
- 931 11. Motta M, Fidan M, Bellacchio E, Pantaleoni F, Schneider-Heieck K, Coppola S, Borck G,  
932 Salviati L, Zenker M, Cirstea IC, Tartaglia M. Dominant Noonan syndrome-causing  
933 LZTR1 mutations specifically affect the Kelch domain substrate-recognition surface and  
934 enhance RAS-MAPK signaling. *Hum Mol Genet.* 2019;28:1007–1022. doi:  
935 10.1093/hmg/ddy412
- 936 12. Sayed N, Liu C, Wu JC. Translation of Human-Induced Pluripotent Stem Cells: From  
937 Clinical Trial in a Dish to Precision Medicine. From Clinical Trial in a Dish to Precision

- 938 Medicine. *Journal of the American College of Cardiology*. 2016;67:2161–2176. doi:  
939 10.1016/j.jacc.2016.01.083
- 940 13. van Mil A, Balk GM, Neef K, Buikema JW, Asselbergs FW, Wu SM, Doevendans PA,  
941 Sluijter JPG. Modelling inherited cardiac disease using human induced pluripotent stem  
942 cell-derived cardiomyocytes: progress, pitfalls, and potential. *Cardiovasc Res*.  
943 2018;114:1828–1842. doi: 10.1093/cvr/cvy208
- 944 14. Meier AB, Raj Murthi S, Rawat H, Toepfer CN, Santamaria G, Schmid M, Mastantuono  
945 E, Schwarzmayr T, Berutti R, Cleuziou J, Ewert P, Görlach A, Klingel K, Laugwitz K-L,  
946 Seidman CE, Seidman JG, Moretti A, Wolf CM. Cell cycle defects underlie childhood-  
947 onset cardiomyopathy associated with Noonan syndrome. *iScience*. 2022;25:103596. doi:  
948 10.1016/j.isci.2021.103596
- 949 15. Jaffré F, Miller CL, Schänzer A, Evans T, Roberts AE, Hahn A, Kontaridis MI. Inducible  
950 Pluripotent Stem Cell-Derived Cardiomyocytes Reveal Aberrant Extracellular Regulated  
951 Kinase 5 and Mitogen-Activated Protein Kinase Kinase 1/2 Signaling Concomitantly  
952 Promote Hypertrophic Cardiomyopathy in RAF1-Associated Noonan Syndrome.  
953 *Circulation*. 2019;140:207–224. doi: 10.1161/CIRCULATIONAHA.118.037227
- 954 16. Josowitz R, Mulero-Navarro S, Rodriguez NA, Falce C, Cohen N, Ullian EM, Weiss LA,  
955 Rauen KA, Sobie EA, Gelb BD. Autonomous and Non-autonomous Defects Underlie  
956 Hypertrophic Cardiomyopathy in BRAF-Mutant hiPSC-Derived Cardiomyocytes. *Stem*  
957 *cell reports*. 2016;7:355–369. doi: 10.1016/j.stemcr.2016.07.018
- 958 17. Higgins EM, Bos JM, Dotzler SM, John Kim CS, Ackerman MJ. MRAS Variants Cause  
959 Cardiomyocyte Hypertrophy in Patient-Specific Induced Pluripotent Stem Cell-Derived  
960 Cardiomyocytes: Additional Evidence for MRAS as a Definitive Noonan Syndrome-



- 961 Susceptibility Gene. *Circ Genom Precis Med.* 2019;12:e002648. doi:  
962 10.1161/CIRCGEN.119.002648
- 963 18. Knauer C, Haltern H, Schoger E, Kügler S, Roos L, Zelarayán LC, Hasenfuss G,  
964 Zimmermann W-H, Wollnik B, Cyganek L. Preclinical evaluation of CRISPR-based  
965 therapies for Noonan syndrome caused by deep-intronic LZTR1 variants. *Molecular*  
966 *Therapy - Nucleic Acids.* 2024;35:102123. doi: 10.1016/j.omtn.2024.102123
- 967 19. Kleinsorge M, Cyganek L. Subtype-Directed Differentiation of Human iPSCs into Atrial  
968 and Ventricular Cardiomyocytes. *STAR protocols.* 2020;1:100026. doi:  
969 10.1016/j.xpro.2020.100026
- 970 20. Kudo T, Jeknić S, Macklin DN, Akhter S, Hughey JJ, Regot S, Covert MW. Live-cell  
971 measurements of kinase activity in single cells using translocation reporters. *Nat Protoc.*  
972 2018;13:155–169. doi: 10.1038/nprot.2017.128
- 973 21. Lemcke H, Skorska A, Lang CI, Johann L, David R. Quantitative Evaluation of the  
974 Sarcomere Network of Human hiPSC-Derived Cardiomyocytes Using Single-Molecule  
975 Localization Microscopy. *Int J Mol Sci.* 2020;21. doi: 10.3390/ijms21082819
- 976 22. Mosqueira D, Mannhardt I, Bhagwan JR, Lis-Slimak K, Katili P, Scott E, Hassan M,  
977 Prondzynski M, Harmer SC, Tinker A, Smith JGW, Carrier L, Williams PM, Gaffney D,  
978 Eschenhagen T, Hansen A, Denning C. CRISPR/Cas9 editing in human pluripotent stem  
979 cell-cardiomyocytes highlights arrhythmias, hypocontractility, and energy depletion as  
980 potential therapeutic targets for hypertrophic cardiomyopathy. *Eur Heart J.* 2018;39:3879–  
981 3892. doi: 10.1093/eurheartj/ehy249
- 982 23. Levin MD, Saitta SC, Gripp KW, Wenger TL, Ganesh J, Kalish JM, Epstein MR, Smith  
983 R, Czosek RJ, Ware SM, Goldenberg P, Myers A, Chatfield KC, Gillespie MJ, Zackai EH,  
984 Lin AE. Nonreentrant atrial tachycardia occurs independently of hypertrophic

- 985 cardiomyopathy in RASopathy patients. *Am J Med Genet A*. 2018;176:1711–1722. doi:  
986 10.1002/ajmg.a.38854
- 987 24. Maron BJ, Desai MY, Nishimura RA, Spirito P, Rakowski H, Towbin JA, Rowin EJ,  
988 Maron MS, Sherrid MV. Diagnosis and Evaluation of Hypertrophic Cardiomyopathy:  
989 JACC State-of-the-Art Review. *J Am Coll Cardiol*. 2022;79:372–389. doi:  
990 10.1016/j.jacc.2021.12.002
- 991 25. Cyganek L, Tiburcy M, Sekeres K, Gerstenberg K, Bohnenberger H, Lenz C, Henze S,  
992 Stauske M, Salinas G, Zimmermann W-H, Hasenfuss G, Guan K. Deep phenotyping of  
993 human induced pluripotent stem cell-derived atrial and ventricular cardiomyocytes. *JCI*  
994 *Insight*. 2018;3:99941. doi: 10.1172/jci.insight.99941
- 995 26. Tiburcy M, Meyer T, Liaw NY, Zimmermann W-H. Generation of Engineered Human  
996 Myocardium in a Multi-well Format. *STAR protocols*. 2020;1:100032. doi:  
997 10.1016/j.xpro.2020.100032
- 998 27. NSEuroNet.com. <https://nseuro.net.com/php/>. Accessed December 29, 2022
- 999 28. Abe T, Umeki I, Kanno S-I, Inoue S, Niihori T, Aoki Y. LZTR1 facilitates  
1000 polyubiquitination and degradation of RAS-GTPases. *Cell Death Differ*. 2020;27:1023–  
1001 1035. doi: 10.1038/s41418-019-0395-5
- 1002 29. Canning P, Cooper CDO, Krojer T, Murray JW, Pike ACW, Chaikuad A, Keates T,  
1003 Thangaratnarajah C, Hojzan V, Marsden BD, Gileadi O, Knapp S, Delft F von, Bullock  
1004 AN. Structural basis for Cul3 protein assembly with the BTB-Kelch family of E3 ubiquitin  
1005 ligases. *J Biol Chem*. 2013;288:7803–7814. doi: 10.1074/jbc.M112.437996
- 1006 30. Mirdita M, Schütze K, Moriwaki Y, Heo L, Ovchinnikov S, Steinegger M. ColabFold:  
1007 making protein folding accessible to all. *Nat Methods*. 2022;19:679–682. doi:  
1008 10.1038/s41592-022-01488-1

- 1009 31. Steklov M, Pandolfi S, Baietti MF, Batiuk A, Carai P, Najm P, Zhang M, Jang H, Renzi  
1010 F, Cai Y, Abbasi Asbagh L, Pastor T, Troyer M de, Simicek M, Radaelli E, Brems H,  
1011 Legius E, Tavernier J, Gevaert K, Impens F, Messiaen L, Nussinov R, Heymans S,  
1012 Eyckerman S, Sablina AA. Mutations in LZTR1 drive human disease by dysregulating  
1013 RAS ubiquitination. *Science*. 2018;362:1177–1182. doi: 10.1126/science.aap7607
- 1014 32. Cuevas-Navarro A, Rodriguez-Muñoz L, Grego-Bessa J, Cheng A, Rauen KA, Urisman  
1015 A, McCormick F, Jimenez G, Castel P. Cross-species analysis of LZTR1 loss-of-function  
1016 mutants demonstrates dependency to RIT1 orthologs. *Elife*. 2022;11. doi:  
1017 10.7554/eLife.76495
- 1018 33. Birket MJ, Raibaud S, Lettieri M, Adamson AD, Letang V, Cervello P, Redon N, Ret G,  
1019 Viale S, Wang B, Biton B, Guillemot J-C, Mikol V, Leonard JP, Hanley NA, Orsini C,  
1020 Itier J-M. A Human Stem Cell Model of Fabry Disease Implicates LIMP-2 Accumulation  
1021 in Cardiomyocyte Pathology. *Stem Cell Reports*. 2019;13:380–393. doi:  
1022 10.1016/j.stemcr.2019.07.004
- 1023 34. Dorsch LM, Schuldt M, dos Remedios CG, Schinkel AFL, Jong PL de, Michels M, Kuster  
1024 DWD, Brundel BJM, van der Velden J. Protein Quality Control Activation and  
1025 Microtubule Remodeling in Hypertrophic Cardiomyopathy. *Cells*. 2019;8. doi:  
1026 10.3390/cells8070741
- 1027 35. Pei J, Schuldt M, Nagyova E, Gu Z, El Bouhaddani S, Yiangou L, Jansen M, Calis JJA,  
1028 Dorsch LM, Blok CS, van den Dungen NAM, Lansu N, Boukens BJ, Efimov IR, Michels  
1029 M, Verhaar MC, Weger R de, Vink A, van Steenbeek FG, Baas AF, Davis RP, Uh HW,  
1030 Kuster DWD, Cheng C, Mokry M, van der Velden J, Asselbergs FW, Harakalova M.  
1031 Multi-omics integration identifies key upstream regulators of pathomechanisms in

- 1032 hypertrophic cardiomyopathy due to truncating MYBPC3 mutations. *Clin Epigenetics*.  
1033 2021;13:61. doi: 10.1186/s13148-021-01043-3
- 1034 36. Kirkegaard T, Gray J, Priestman DA, Wallom K-L, Atkins J, Olsen OD, Klein A,  
1035 Drndarski S, Petersen NHT, Ingemann L, Smith DA, Morris L, Bornæs C, Jørgensen SH,  
1036 Williams I, Hinsby A, Arenz C, Begley D, Jäättelä M, Platt FM. Heat shock protein-based  
1037 therapy as a potential candidate for treating the sphingolipidoses. *Sci. Transl. Med.*  
1038 2016;8:355ra118. doi: 10.1126/scitranslmed.aad9823
- 1039 37. Kim Y-K, Suarez J, Hu Y, McDonough PM, Boer C, Dix DJ, Dillmann WH. Deletion of  
1040 the inducible 70-kDa heat shock protein genes in mice impairs cardiac contractile function  
1041 and calcium handling associated with hypertrophy. *Circulation*. 2006;113:2589–2597. doi:  
1042 10.1161/CIRCULATIONAHA.105.598409
- 1043 38. Ranek MJ, Stachowski MJ, Kirk JA, Willis MS. The role of heat shock proteins and co-  
1044 chaperones in heart failure. *Philos Trans R Soc Lond , B, Biol Sci*. 2018;373. doi:  
1045 10.1098/rstb.2016.0530
- 1046 39. Fernández-Fernández MR, Gragera M, Ochoa-Ibarrola L, Quintana-Gallardo L, Valpuesta  
1047 JM. Hsp70 - a master regulator in protein degradation. *FEBS Letters*. 2017;591:2648–  
1048 2660. doi: 10.1002/1873-3468.12751
- 1049 40. Nakamura M, Sadoshima J. Mechanisms of physiological and pathological cardiac  
1050 hypertrophy. *Nat Rev Cardiol*. 2018;15:387–407. doi: 10.1038/s41569-018-0007-y
- 1051 41. Nakhaei-Rad S, Bazgir F, Dahlmann J, Busley AV, Buchholzer M, Haghighi F, Schänzer  
1052 A, Hahn A, Kötter S, Schanze D, Anand R, Funk F, Borchardt A, Kronenbitter AV,  
1053 Scheller J, Piekorz RP, Reichert AS, Volleth M, Wolf MJ, Cirstea IC, Gelb BD, Tartaglia  
1054 M, Schmitt J, Krüger M, Kutschka I, Cyganek L, Zenker M, Kensah G, Ahmadian MR.  
1055 Alteration of myocardial structure and function in RAF1-associated Noonan syndrome:

- 1056 Insights from cardiac disease modeling based on patient-derived iPSCs. *bioRxiv*. 2022.  
1057 doi: 10.1101/2022.01.22.477319
- 1058 42. Wang Y, Zhang J, Zhang P, Zhao Z, Huang Q, Yun D, Chen J, Chen H, Wang C, Lu D.  
1059 LZTR1 inactivation promotes MAPK/ ERK pathway activation in glioblastoma by  
1060 stabilizing oncoprotein RIT1. *bioRxiv*. 2020. doi: 10.1101/2020.03.14.989954
- 1061 43. Marzahn MR, Marada S, Lee J, Nourse A, Kenrick S, Zhao H, Ben-Nissan G, Kolaitis R-  
1062 M, Peters JL, Pounds S, Errington WJ, Privé GG, Taylor JP, Sharon M, Schuck P, Ogden  
1063 SK, Mittag T. Higher-order oligomerization promotes localization of SPOP to liquid  
1064 nuclear speckles. *EMBO J*. 2016;35:1254–1275. doi: 10.15252/emj.201593169
- 1065 44. Karbassi E, Fenix A, Marchiano S, Muraoka N, Nakamura K, Yang X, Murry CE.  
1066 Cardiomyocyte maturation: advances in knowledge and implications for regenerative  
1067 medicine. *Nat Rev Cardiol*. 2020;17:341–359. doi: 10.1038/s41569-019-0331-x
- 1068 45. Guo Y, Pu WT. Cardiomyocyte Maturation: New Phase in Development. *Circ Res*.  
1069 2020;126:1086–1106. doi: 10.1161/CIRCRESAHA.119.315862
- 1070 46. Rössler U, Hennig AF, Stelzer N, Bose S, Kopp J, Søre K, Cyganek L, Zifarelli G, Ali S,  
1071 Hagen M von der, Strässler ET, Hahn G, Pusch M, Stauber T, Izsvák Z, Gossen M,  
1072 Stachelscheid H, Kornak U. Efficient generation of osteoclasts from human induced  
1073 pluripotent stem cells and functional investigations of lethal CLCN7-related osteopetrosis.  
1074 *J Bone Miner Res*. 2021;36:1621–1635. doi: 10.1002/jbmr.4322
- 1075 47. Yousefi R, Fornasiero EF, Cyganek L, Montoya J, Jakobs S, Rizzoli SO, Rehling P,  
1076 Pacheu-Grau D. Monitoring mitochondrial translation in living cells. *EMBO Rep*.  
1077 2021;22:e51635. doi: 10.15252/embr.202051635
- 1078 48. Haeussler M, Schönig K, Eckert H, Eschstruth A, Mianné J, Renaud J-B, Schneider-  
1079 Maunoury S, Shkumatava A, Teboul L, Kent J, Joly J-S, Concordet J-P. Evaluation of off-

- 1080 target and on-target scoring algorithms and integration into the guide RNA selection tool  
1081 CRISPOR. *Genome Biol.* 2016;17:148. doi: 10.1186/s13059-016-1012-2
- 1082 49. Schmidt U, Weigert M, Broaddus C, Myers G. Cell Detection with Star-Convex Polygons.  
1083 In: Frangi AF, Schnabel JA, Davatzikos C, Alberola-López C, Fichtinger G, eds. *Cell*  
1084 *Detection with Star-Convex Polygons*. Cham: Springer International Publishing,  
1085 2018:265–273
- 1086 50. Ahlers J, Althviz Moré D, Amsalem O, Anderson A, Bokota G, Boone P, Bragantini J,  
1087 Buckley G, Burt A, Bussonnier M, Can Solak A, Caporal C, Doncila Pop D, Evans K,  
1088 Freeman J, Gaifas L, Gohlke C, Gunalan K, Har-Gil H, Harfouche M, Harrington KIS,  
1089 Hilsenstein V, Hutchings K, Lambert T, Lauer J, Lichtner G, Liu Z, Liu L, Lowe A,  
1090 Marconato L, Martin S, McGovern A, Migas L, Miller N, Muñoz H, Müller J-H, Nauroth-  
1091 Kreß C, Nunez-Iglesias J, Pape C, Pevey K, Peña-Castellanos G, Pierré A, Rodríguez-  
1092 Guerra J, Ross D, Royer L, Russell CT, Selzer G, Smith P, Sobolewski P, Sofiiuk K,  
1093 Sofroniew N, Stansby D, Sweet A, Vierdag W-M, Wadhwa P, Weber Mendonça M,  
1094 Windhager J, Winston P, Yamauchi K. *napari: a multi-dimensional image viewer for*  
1095 *Python*: Zenodo, 2023
- 1096 51. Zech ATL, Prondzynski M, Singh SR, Pietsch N, Orthey E, Alizoti E, Busch J, Madsen A,  
1097 Behrens CS, Meyer-Jens M, Mearini G, Lemoine MD, Krämer E, Mosqueira D, Viridi S,  
1098 Indenbirken D, Depke M, Salazar MG, Völker U, Braren I, Pu WT, Eschenhagen T,  
1099 Hammer E, Schlossarek S, Carrier L. ACTN2 Mutant Causes Proteopathy in Human iPSC-  
1100 Derived Cardiomyocytes. *Cells.* 2022;11. doi: 10.3390/cells11172745
- 1101 52. Suomi T, Elo LL. Enhanced differential expression statistics for data-independent  
1102 acquisition proteomics. *Sci Rep.* 2017;7:5869. doi: 10.1038/s41598-017-05949-y

- 1103 53. Seyednasrollah F, Rantanen K, Jaakkola P, Elo LL. ROTS: reproducible RNA-seq  
1104 biomarker detector-prognostic markers for clear cell renal cell cancer. *Nucleic Acids Res.*  
1105 2016;44:e1. doi: 10.1093/nar/gkv806
- 1106 54. Bindea G, Mlecnik B, Hackl H, Charoentong P, Tosolini M, Kirilovsky A, Fridman W-H,  
1107 Pagès F, Trajanoski Z, Galon J. ClueGO: a Cytoscape plug-in to decipher functionally  
1108 grouped gene ontology and pathway annotation networks. *Bioinformatics.* 2009;25:1091–  
1109 1093. doi: 10.1093/bioinformatics/btp101
- 1110 55. Pasqualin C, Gannier F, Yu A, Malécot CO, Bredeloux P, Maupoil V. SarcOptiM for  
1111 ImageJ: high-frequency online sarcomere length computing on stimulated  
1112 cardiomyocytes. *Am J Physiol , Cell Physiol.* 2016;311:C277-83. doi:  
1113 10.1152/ajpcell.00094.2016
- 1114 56. Nacak TG, Leptien K, Fellner D, Augustin HG, Kroll J. The BTB-kelch protein LZTR-1  
1115 is a novel Golgi protein that is degraded upon induction of apoptosis. *J Biol Chem.*  
1116 2006;281:5065–5071. doi: 10.1074/jbc.M509073200
- 1117 57. Eberth A, Ahmadian MR. In vitro GEF and GAP assays. *Curr Protoc Cell Biol.*  
1118 2009;Chapter 14:Unit 14.9. doi: 10.1002/0471143030.cb1409s43
- 1119 58. Evans R, O'Neill M, Pritzel A, Antropova N, Senior A, Green T, Žídek A, Bates R,  
1120 Blackwell S, Yim J, Ronneberger O, Bodenstein S, Zielinski M, Bridgland A, Potapenko  
1121 A, Cowie A, Tunyasuvunakool K, Jain R, Clancy E, Kohli P, Jumper J, Hassabis D. Protein  
1122 complex prediction with AlphaFold-Multimer. *bioRxiv.* 2021. doi:  
1123 10.1101/2021.10.04.463034
- 1124



1125 **Figure Legends**

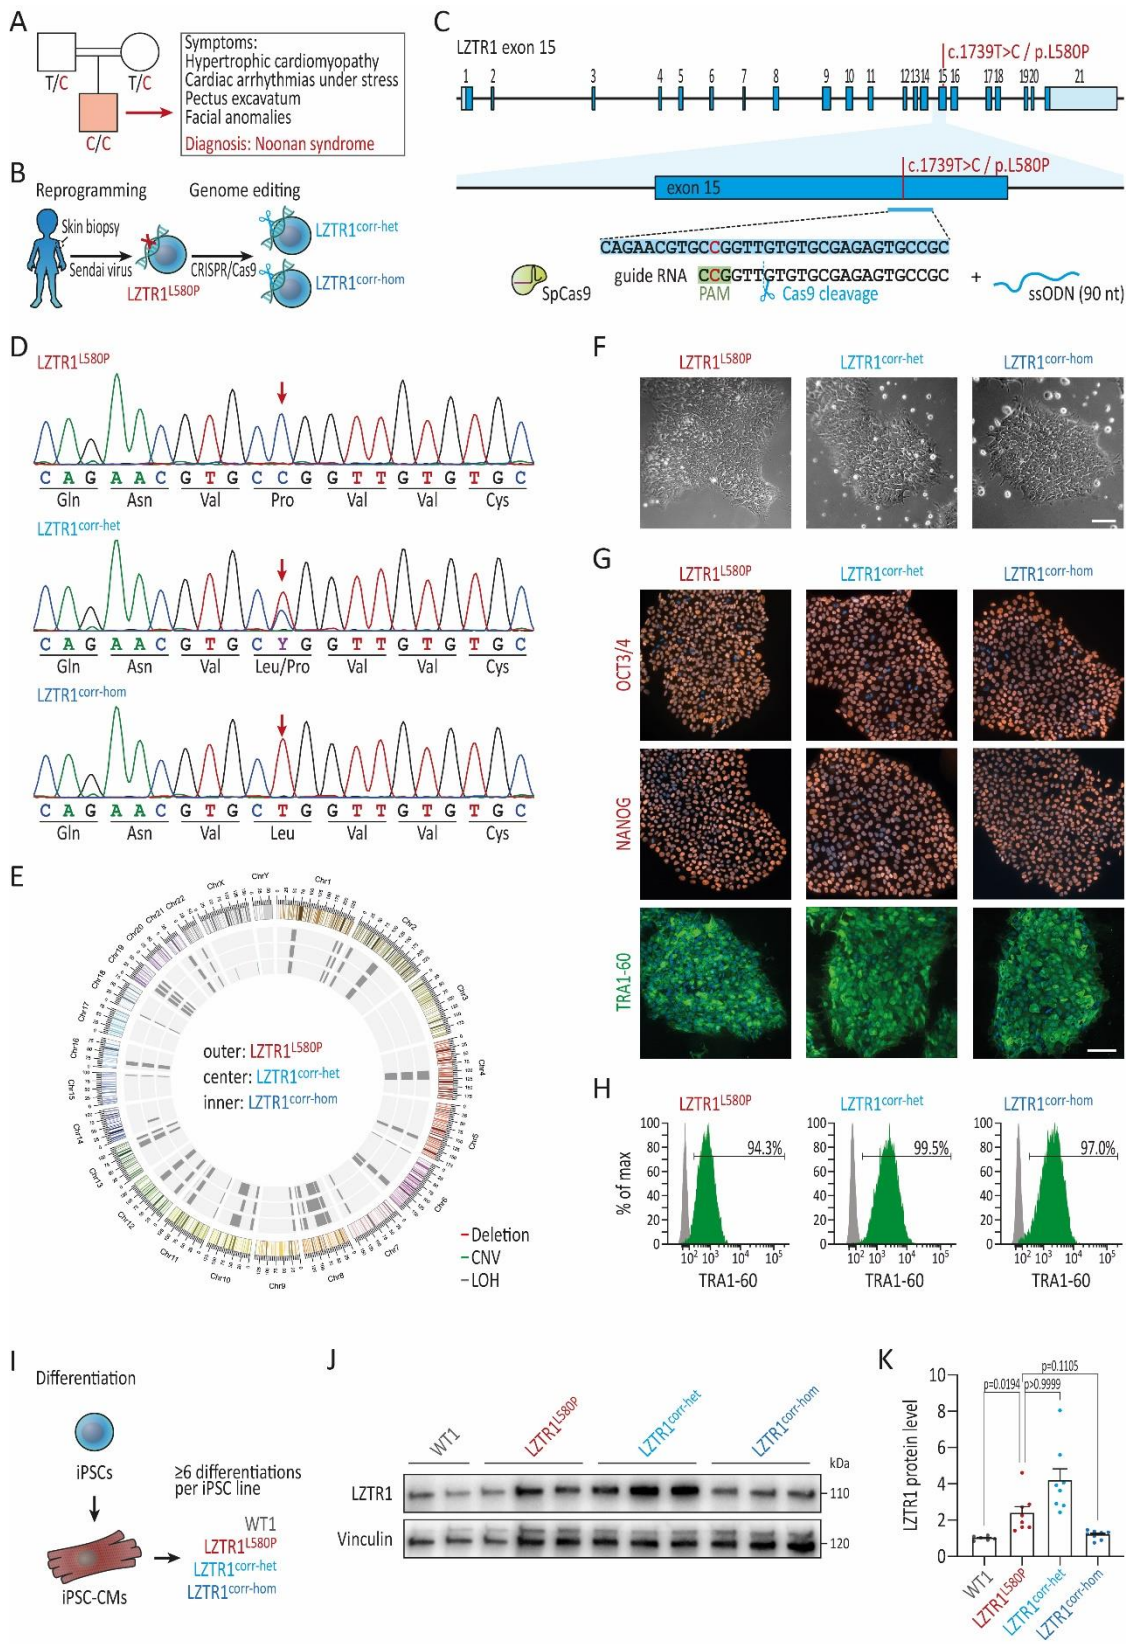

1126

1127 **Figure 1: Generation of patient-specific and CRISPR-corrected iPSCs for disease**



1128 **modeling of recessive NS. (A)** Pedigree of the consanguineous family with healthy parents and  
1129 the son affected by recessive NS harboring the *LZTR1* variant (c.1739T>C/p.L580P) in  
1130 homozygosity. **(B)** Generation of patient-specific iPSCs by reprogramming of patient's skin  
1131 fibroblasts via integration-free Sendai virus and genetic correction of the missense variant by  
1132 CRISPR/Cas9. **(C)** Depiction of the genome editing approach for correction of the missense  
1133 variant in *LZTR1* exon 15 by CRISPR/Cas9 and single-stranded oligonucleotide (ssODN) for  
1134 homology-directed repair. **(D)** Sanger sequencing of the patient-derived iPSCs (*LZTR1*<sup>L580P</sup>)  
1135 with the *LZTR1* missense variant in homozygosity and the CRISPR/Cas9-edited heterozygous  
1136 corrected (*LZTR1*<sup>corr-het</sup>) and homozygous corrected (*LZTR1*<sup>corr-hom</sup>) iPSCs. **(E)** Molecular  
1137 karyotyping using a genome-wide microarray demonstrated a high percentage of loss of  
1138 heterozygosity (LOH) because of consanguinity as well as chromosomal stability of iPSCs after  
1139 genome editing. **(F)** Patient-specific and CRISPR-corrected iPSCs showed a typical human  
1140 stem cell-like morphology; scale bar: 100  $\mu$ m. **(G)** Expression of key pluripotency markers  
1141 OCT3/4, NANOG, and TRA-1-60 in the generated iPSC lines was assessed by  
1142 immunocytochemistry; nuclei were counter-stained with Hoechst 33342 (blue); scale bar:  
1143 100  $\mu$ m. **(H)** Flow cytometry analysis of pluripotency marker TRA-1-60 revealed homogeneous  
1144 populations of pluripotent cells in generated iPSC lines. Gray peaks represent the negative  
1145 controls. **(I)** Differentiation of WT, patient-specific and CRISPR-corrected iPSCs into iPSC-  
1146 CMs. **(J)** Representative blot of endogenous *LZTR1* levels in WT, patient's, and CRISPR-  
1147 corrected iPSC-CMs at day 60 of differentiation, assessed by Western blot; Vinculin served as  
1148 loading control; n=3 individual differentiations per iPSC line. **(K)** Quantitative analysis of  
1149 Western blots for *LZTR1*; data were normalized to total protein and to the corresponding WT  
1150 samples on each membrane; n=6-8 independent differentiations per iPSC line. Data were  
1151 analyzed by nonparametric Kruskal-Wallis test with Dunn correction and are presented as mean  
1152  $\pm$  SEM (K).

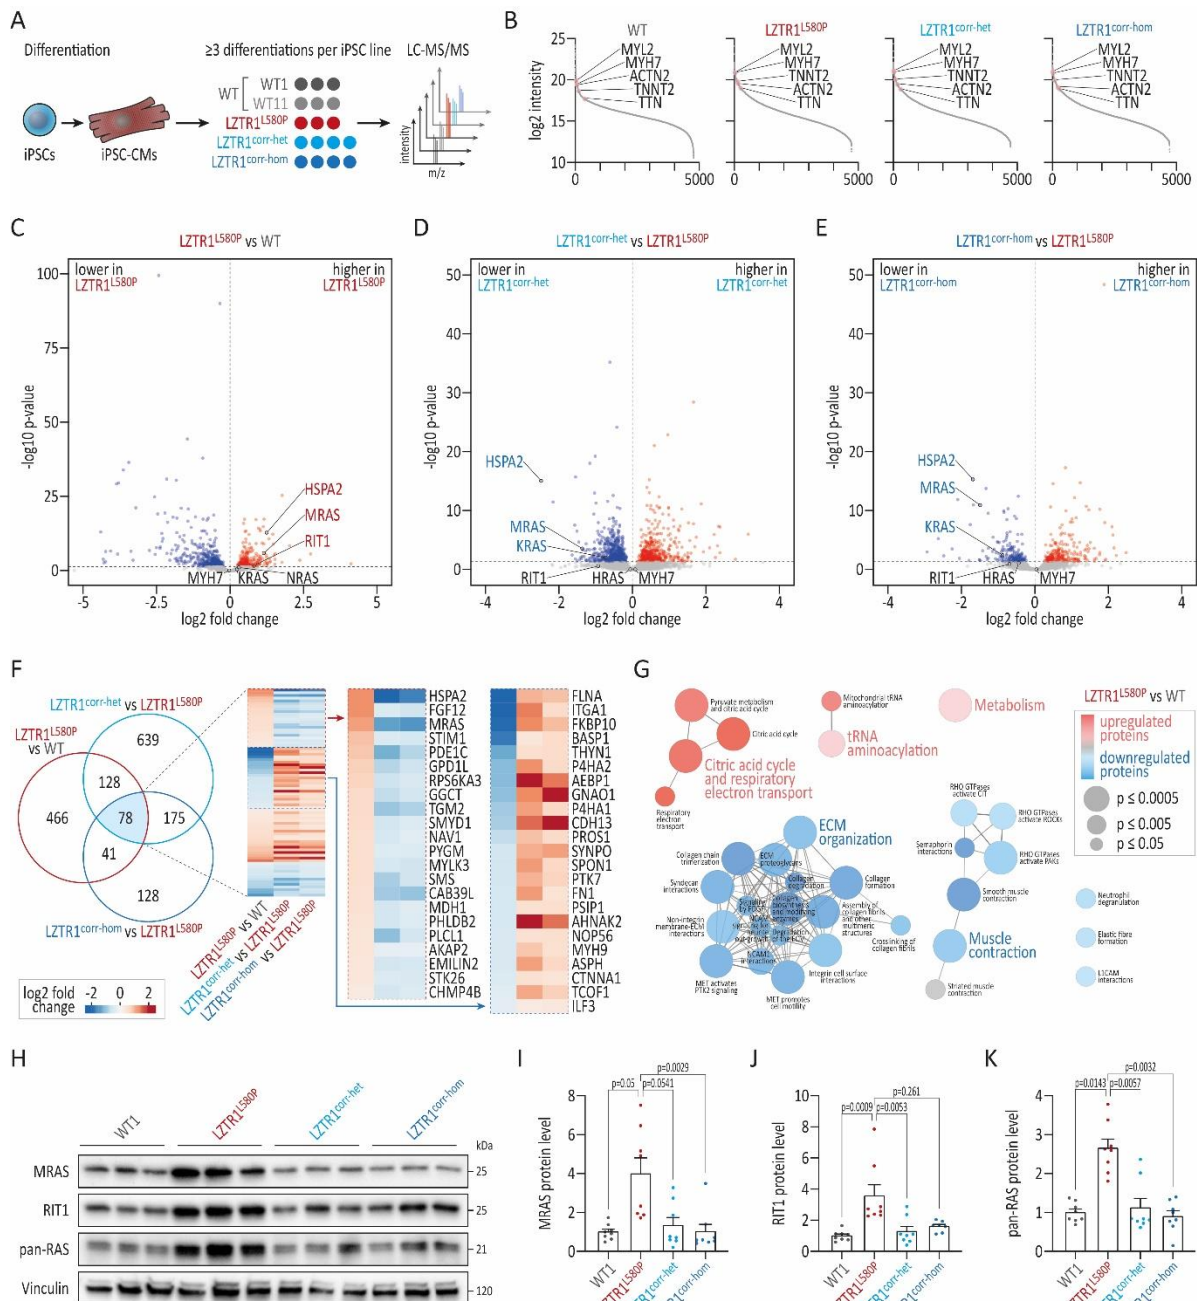

1153

1154 **Figure 2: Homozygous *LZTR1*<sup>L580P</sup> causes accumulation of RAS GTPases. (A)** Depiction

1155 of the experimental design: two individual WT, the patient-specific, and the two CRISPR-

1156 corrected iPSC lines were differentiated into ventricular iPSC-CMs and analyzed by

1157 quantitative global proteomics via LC-MS/MS at day 60 of differentiation; n=3-4 individual

1158 differentiations per iPSC line. (B) Over 4,700 proteins were present in the individual proteomic

1159 samples, all showing comparable high abundance of cardiac myosin heavy chain β

1160 (*MHY7*), cardiac troponin T (*TNNT2*), α-actinin (*ACTN2*), titin (*TTN*), and ventricular-specific

1161 MLC2V (*MYL2*). **(C-E)** Volcano plots representing relative protein abundances comparing  
1162 patient's versus WT iPSC-CMs (C; LZTR1<sup>L580P</sup> vs WT), heterozygous corrected versus non-  
1163 corrected iPSC-CMs (D; LZTR1<sup>corr-het</sup> vs LZTR1<sup>L580P</sup>), and homozygous corrected versus non-  
1164 corrected iPSC-CMs (E; LZTR1<sup>corr-hom</sup> vs LZTR1<sup>L580P</sup>) revealed high abundance of RAS  
1165 GTPases in patient samples. **(F)** Comparison of differentially abundant proteins between the  
1166 three datasets revealed an overlap of 78 proteins, many of which showed opposite abundance  
1167 in patient's versus CRISPR-corrected iPSC-CMs. **(G)** Reactome pathway enrichment analysis  
1168 of differentially abundant proteins in LZTR1<sup>L580P</sup> vs WT displayed dysregulation of cardiac-  
1169 related pathways and biological processes. **(H)** Representative blots of RAS GTPase levels in  
1170 WT, patient's, and CRISPR-corrected iPSC-CMs at day 60 of differentiation, assessed by  
1171 Western blot; Vinculin served as loading control; n=3 individual differentiations per iPSC line.  
1172 **(I-K)** Quantitative analysis of Western blots for MRAS (I), RIT1 (J), and pan-RAS recognizing  
1173 HRAS, KRAS, and NRAS (K); data were normalized to total protein and to the corresponding  
1174 WT samples on each membrane; n=8 independent differentiations per iPSC line. Data were  
1175 analyzed by nonparametric Kruskal-Wallis test with Dunn correction and are presented as mean  
1176  $\pm$  SEM (I-K).

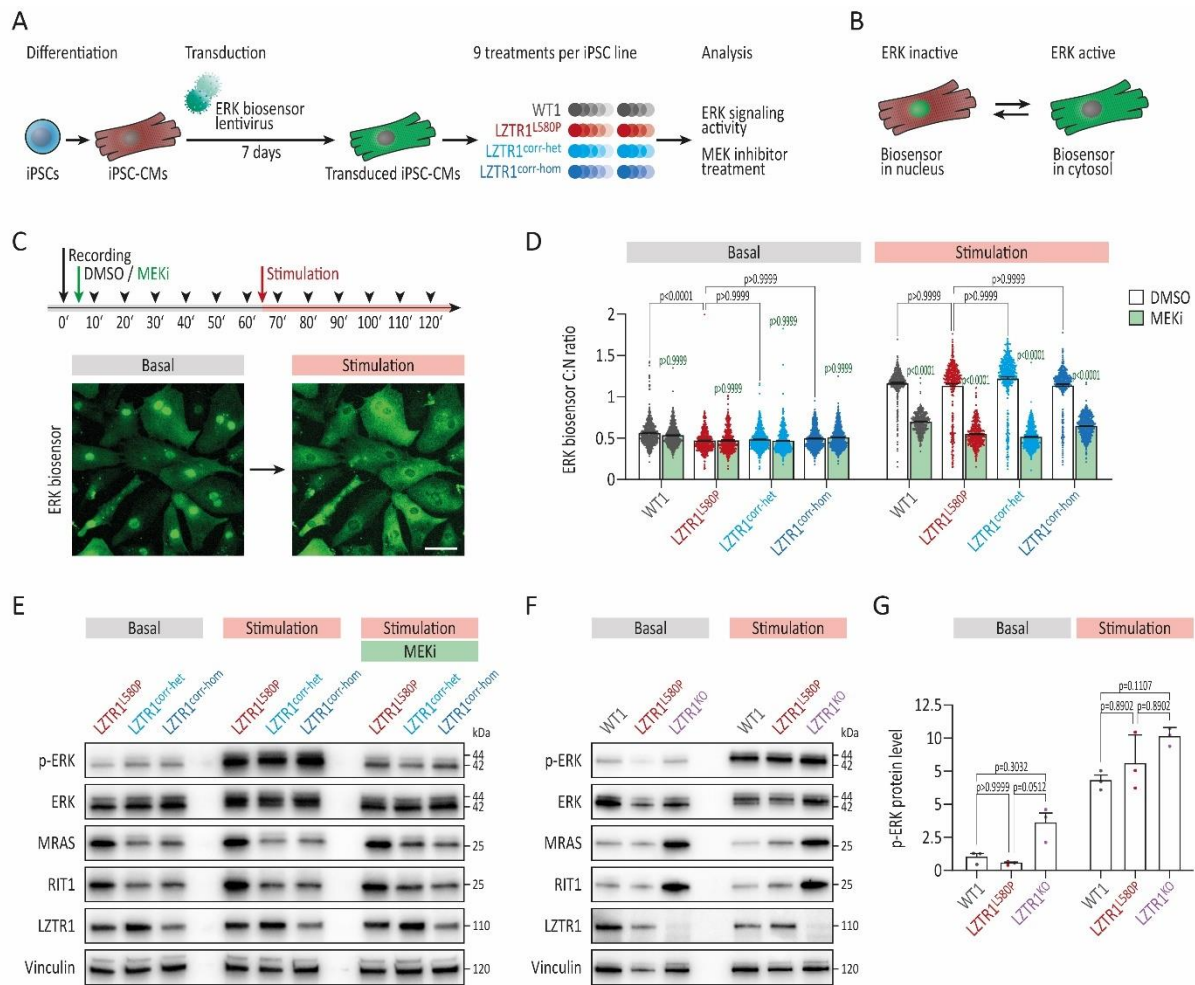

1177

1178 **Figure 3: Homozygous *LZTR1*<sup>L580P</sup> retains a residual protein function.** (A) Depiction of the  
 1179 experimental design: the WT, the patient-specific, and the two CRISPR-corrected iPSC lines  
 1180 were differentiated into ventricular iPSC-CMs and transduced around day 50 of differentiation  
 1181 with lentivirus containing an ERK kinase translocation reporter (ERK-KTR) to measure ERK  
 1182 signaling dynamics in real time. (B) ERK activity was analyzed by measuring the ratio of  
 1183 cytosolic (corresponding to active ERK) to nuclear (corresponding to inactive ERK) fluorescent  
 1184 signals. (C) Biosensor-transduced iPSC-CMs were treated with MEK inhibitor trametinib  
 1185 (MEKi) or with DMSO for 60 minutes, before stimulation with serum for another 60 minutes,  
 1186 and imaged every 10 minutes. (D) Quantitative analysis of ERK biosensor cytosol/nucleus  
 1187 (C:N) ratio under basal conditions (60 minutes after MEKi/DMSO treatment) and 20 minutes  
 1188 after stimulation; n=2 independent differentiations per iPSC line with n=4-5 individual wells

1189 per condition. **(E)** Representative blots of p-ERK, ERK, MRAS, RIT1, and LZTR1 levels in  
1190 patient's and CRISPR-corrected iPSC-CMs at day 60 of differentiation under basal conditions  
1191 and 30 minutes after stimulation with and without pre-treatment with MEKi, assessed by  
1192 Western blot; Vinculin served as loading control. **(F)** Representative blots of p-ERK, ERK,  
1193 MRAS, RIT1, and LZTR1 levels in WT, patient's and LZTR1<sup>KO</sup> iPSC-CMs at day 60 of  
1194 differentiation under basal conditions and 30 minutes after stimulation, assessed by Western  
1195 blot; Vinculin served as loading control. **(G)** Quantitative analysis of Western blots for p-ERK  
1196 protein levels; data were normalized to total protein and to the corresponding WT samples on  
1197 each membrane; n=3 independent differentiations per iPSC line. Data were analyzed by  
1198 nonparametric Kruskal-Wallis test with Dunn correction and are presented as mean  $\pm$  SEM (D,  
1199 G).



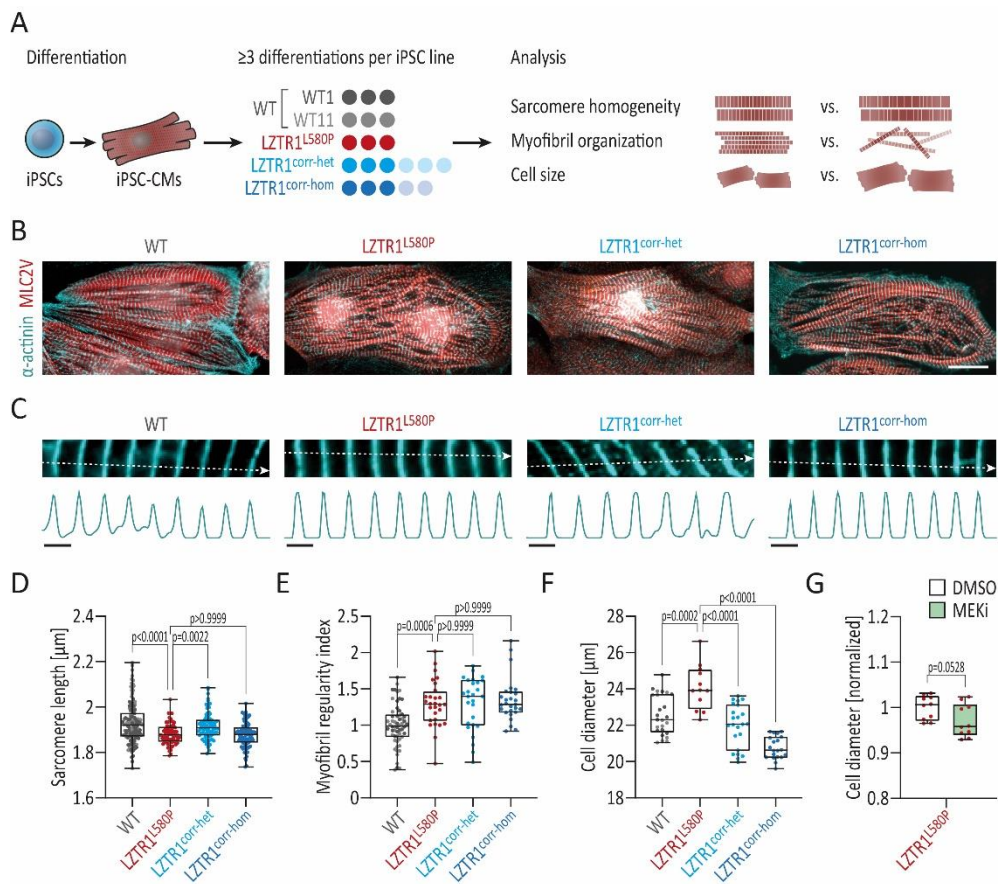

1200

1201 **Figure 4: Homozygous *LZTR1*<sup>L580P</sup> provokes cardiomyocyte hypertrophy.** (A) Depiction  
 1202 of the experimental design: two individual WT, the patient-specific, and the two CRISPR-  
 1203 corrected iPSC lines were differentiated into ventricular iPSC-CMs and analyzed for sarcomere  
 1204 length, myofibril organization, and cell size at day 60 of differentiation. (B) Representative  
 1205 images of iPSC-CMs stained for α-actinin and ventricular-specific MLC2V indicated a regular  
 1206 and well-organized sarcomeric assembly across all iPSC lines; scale bar: 20 μm. (C) Analysis  
 1207 of the mean sarcomere length per cell was based on measurement of multiple α-actinin-stained  
 1208 individual myofibrils; representative myofibrils and corresponding intensity plots are shown;  
 1209 scale bar: 2 μm. (D) Quantitative analysis displayed a typical sarcomere length in iPSC-CMs  
 1210 ranging from 1.7 to 2.2 μm across all iPSC lines; n=75-135 cells from 3 individual  
 1211 differentiations per iPSC line. (E) Quantitative analysis of the myofibril organization in α-  
 1212 actinin-stained iPSC-CMs, assessed by Fast Fourier Transform algorithm, demonstrated a high  
 1213 myofibril regularity across all iPSC lines; data were normalized to WT; n=27-58 images from

1214 3 individual differentiations per iPSC line. **(F)** Quantitative analysis of the cell diameter in  
1215 suspension in singularized iPSC-CMs, assessed by CASY cell counter, revealed a hypertrophic  
1216 cell diameter in patient's cells, compared with WT and CRISPR-corrected iPSC-CMs; n=12-  
1217 25 samples from 3-6 individual differentiations per iPSC line. **(G)** Quantitative analysis of the  
1218 cell diameter in suspension in singularized patient-specific iPSC-CMs that were treated with  
1219 MEK inhibitor trametinib (MEKi) or with DMSO for 5 days, assessed by CASY cell counter;  
1220 n=3 independent differentiations with n=3-4 individual wells per condition. Data were analyzed  
1221 by nonparametric Kruskal-Wallis test with Dunn correction (D-F) or unpaired t test (G) and are  
1222 presented as mean  $\pm$  SEM.

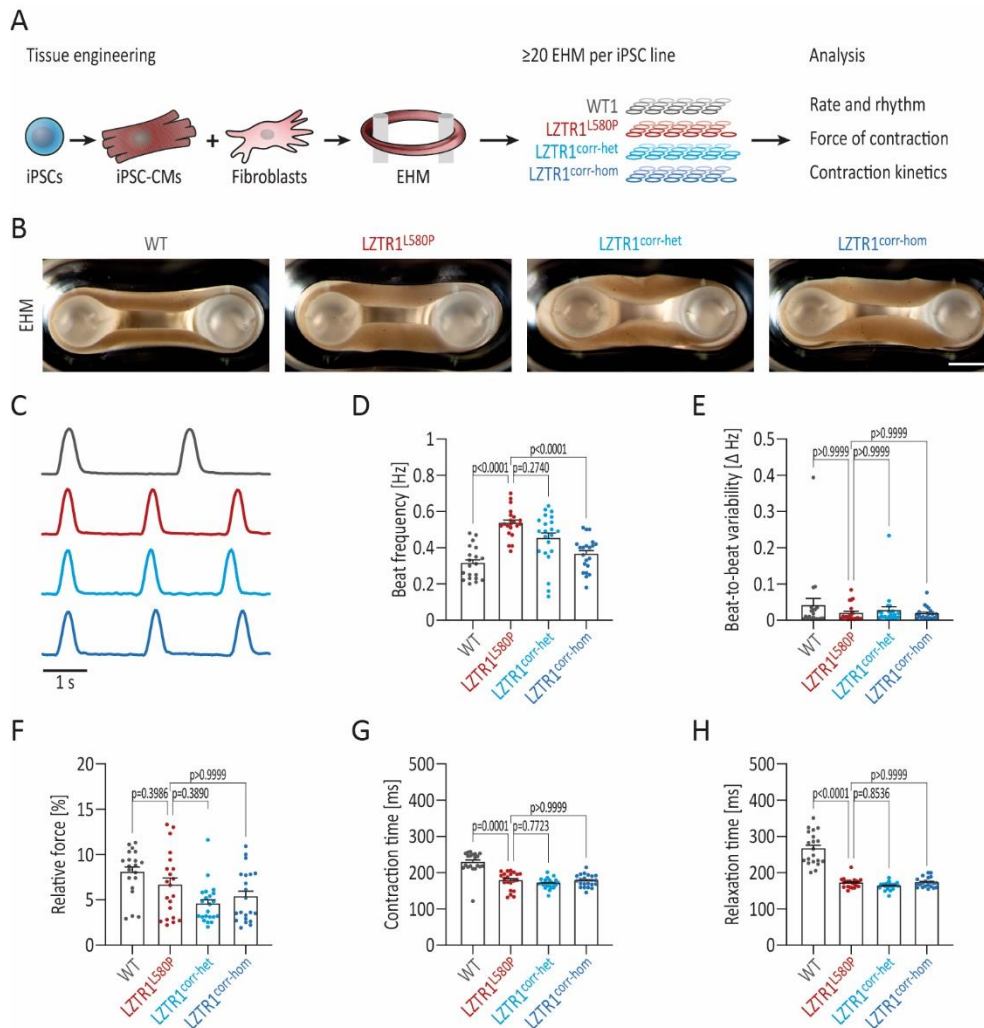

1223

1224 **Figure 5: Homozygous *LZTR1*<sup>L580P</sup> does not compromise contractile function.** (A)

1225 Depiction of the experimental design: the WT, the patient-specific, and the two CRISPR-

1226 corrected iPSC lines were differentiated into ventricular iPSC-CMs and casted at day 30 of

1227 differentiation together with fibroblasts in a collagen matrix for generation of EHMs. Tissues

1228 were analyzed for rhythmogenicity and contractile parameters by optical recordings at 5-6

1229 weeks post-casting; n=20-22 EHMs from 3 individual differentiations per iPSC line. (B)

1230 Representative microscopic images of generated EHMs 6 weeks post-casting showing

1231 comparable tissue morphologies; scale bar: 1 mm. (C) Exemplary contraction traces from

1232 optical recordings of EHMs 6 weeks post-casting; peak amplitudes were normalized. (D)

1233 Quantitative analysis of the beating frequency of spontaneously contracting EHMs displayed



1234 minor differences in patient-derived tissues. **(E)** Quantitative measurement of the beat-to-beat  
1235 variability of spontaneously contracting EHMs showed equal beating regularities across all  
1236 tissues. **(F)** Quantitative analysis of the force of contraction, assessed by measuring the relative  
1237 deflection of flexible poles, identified no significant differences across all iPSC lines. **(G-H)**  
1238 Quantitative analysis of the contraction kinetics revealed longer contraction times (G) and  
1239 relaxation times (H) in WT compared to patient's and CRISPR-corrected EHMs. Data were  
1240 analyzed by nonparametric Kruskal-Wallis test with Dunn correction and are presented as mean  
1241  $\pm$  SEM (D-H).

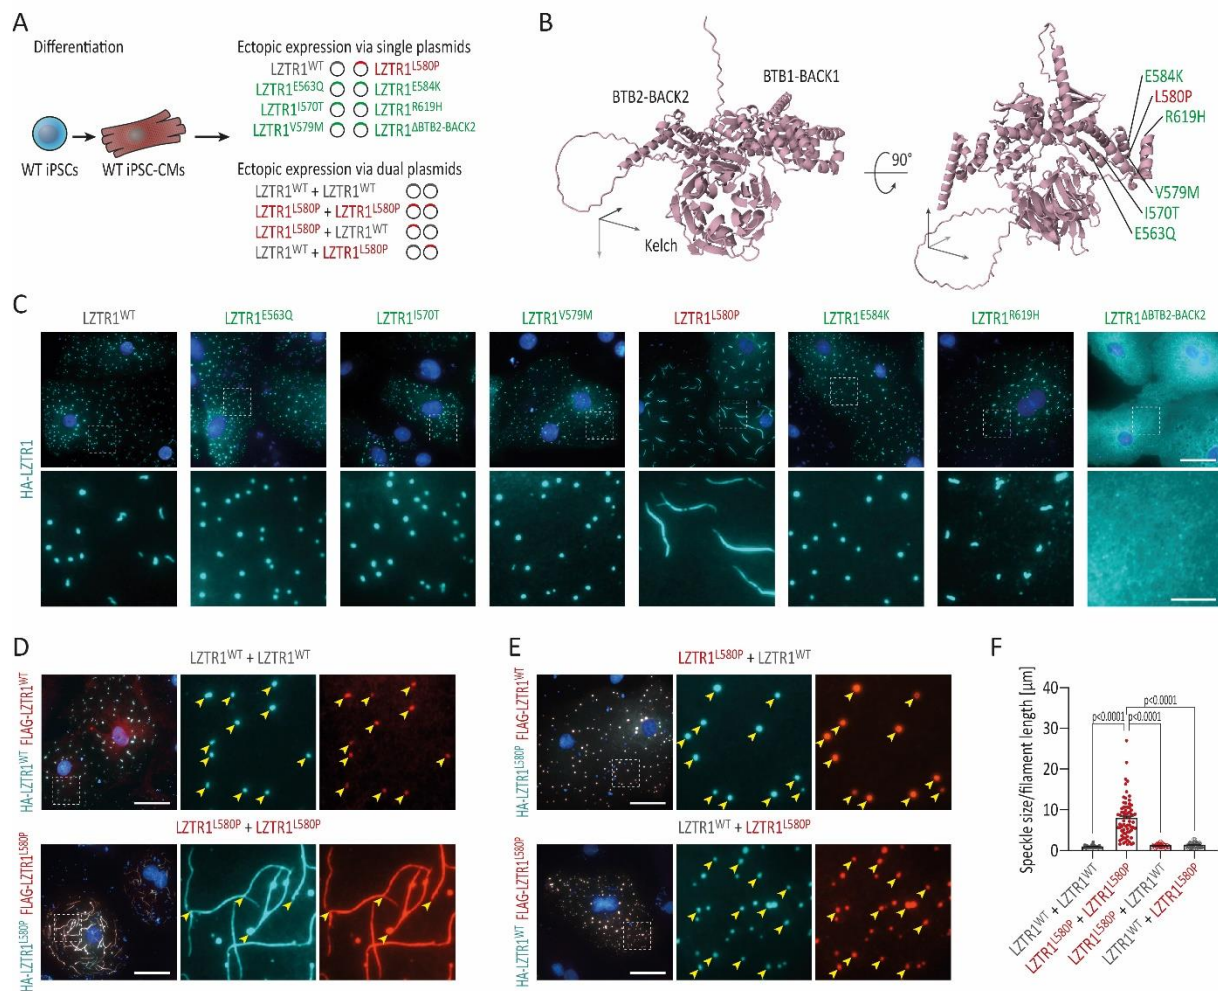

1242

1243 **Figure 6: Homozygous *LZTR1*<sup>L580P</sup> induces polymerization of LZTR1-cullin 3 ubiquitin**

1244 **ligase complexes.** (A) Depiction of the experimental design: the WT iPSC line was

1245 differentiated into ventricular iPSC-CMs, transfected at day 60 of differentiation with plasmids

1246 by lipofection for ectopic expression of LZTR1 variants and analyzed 24 h post-transfection

1247 for subcellular localization LZTR1 complexes. (B) AlphaFold protein structure of monomeric

1248 LZTR1 highlighting the location of selected variants within the BACK1 domain. (C)

1249 Representative images of iPSC-CMs after single plasmid transfection stained for HA-tagged

1250 LZTR1 revealed that LZTR1<sup>WT</sup> and most other variants present a speckle-like pattern equally

1251 distributed throughout the cytoplasm, whereas missense variant LZTR1<sup>L580P</sup> forms large

1252 filaments; nuclei were counter-stained with Hoechst 33342 (blue); scale bars: 20 μm in upper

1253 panel, 5 μm in lower panel. (D-E) Representative images of iPSC-CMs after dual plasmid

1254 transfection stained for HA-tagged and FLAG-tagged LZTR1 confirmed the filament formation  
1255 of LZTR1<sup>L580P</sup> (D), whereas co-expression of LZTR1<sup>WT</sup> and LZTR1<sup>L580P</sup> in different  
1256 combinations resolved the polymer chains (E); nuclei were counter-stained with Hoechst 33342  
1257 (blue); scale bar: 20  $\mu$ m. (F) Quantitative analysis of the mean speckle size and mean filament  
1258 length per cell of HA-tagged LZTR1 in co-transfected iPSC-CMs, assessed by a customized  
1259 CellProfiler pipeline, confirmed formation of LZTR1<sup>L580P</sup>-induced filaments; n=34-74 cells per  
1260 condition. Data were analyzed by nonparametric Kruskal-Wallis test with Dunn correction and  
1261 are presented as mean  $\pm$  SEM (F).

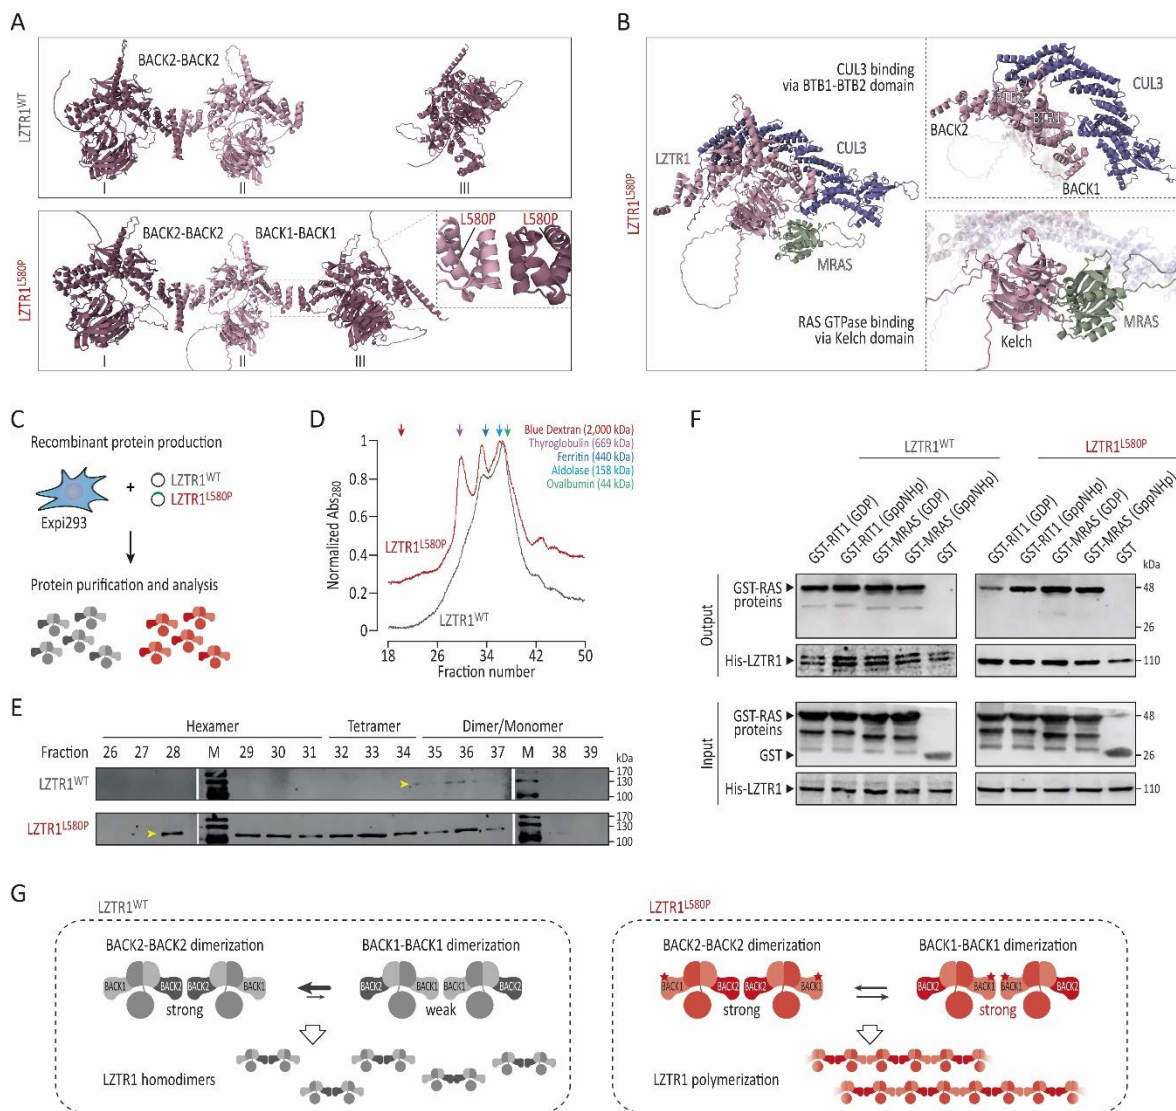

1262

1263 **Figure 7: Homozygous *LZTR1*<sup>L580P</sup> alters binding affinities of dimerization domains. (A)**

1264 Computational modeling of the top-ranked LZTR1 homo-trimer interactions of selected

1265 variants within the BACK1 domain, assessed by the predicted alignment error generated by

1266 ColabFold, predicted a dimer plus monomer configuration via BACK2-BACK2 dimerization

1267 for LZTR1<sup>WT</sup> and the other variants, whereas the top-ranked model for LZTR1<sup>L580P</sup> was

1268 predicted to form linear trimers via BACK2-BACK2 and BACK1-BACK1 dimerization. (B)

1269 Computational modeling of the interaction between LZTR1<sup>L580P</sup> and its binding partners

1270 predicted binding to cullin 3 (CUL3) via the BTB1-BTB2 domain and to MRAS via the Kelch

1271 domain. (C) Production of LZTR1<sup>WT</sup> and LZTR1<sup>L580P</sup> recombinant proteins from Expi-293F

1272 cells for characterization of molecular masses of proteins and protein complexes. (D) Analytical

1273 size exclusion chromatography of soluble recombinant LZTR1 proteins revealed a higher order  
1274 oligomerization profile for LZTR1<sup>L580P</sup> compared to the less complex elution profile of  
1275 LZTR1<sup>WT</sup>. **(E)** Immunoblotting of the fractions showed elution of LZTR1<sup>L580P</sup> as hexamer,  
1276 tetramer, and dimer/monomer, whereas LZTR1<sup>WT</sup> eluted predominantly as dimer/monomer.  
1277 **(F)** Pull-down assay analysis showed comparable binding affinities of LZTR1<sup>WT</sup> and  
1278 LZTR1<sup>L580P</sup> with MRAS and RIT1 proteins in both inactive (GDP-bound) and active  
1279 (GppNHp-bound) states. **(G)** Hypothetical model for LZTR1 complex formation: whereas  
1280 LZTR1<sup>WT</sup> assembles in homo-dimers via the BACK2-BACK2 dimerization domain,  
1281 LZTR1<sup>L580P</sup> might alter the binding affinity of the BACK1 domain, causing formation of linear  
1282 LZTR1 polymer chains via dimerization of both BACK2 and BACK1 domains.



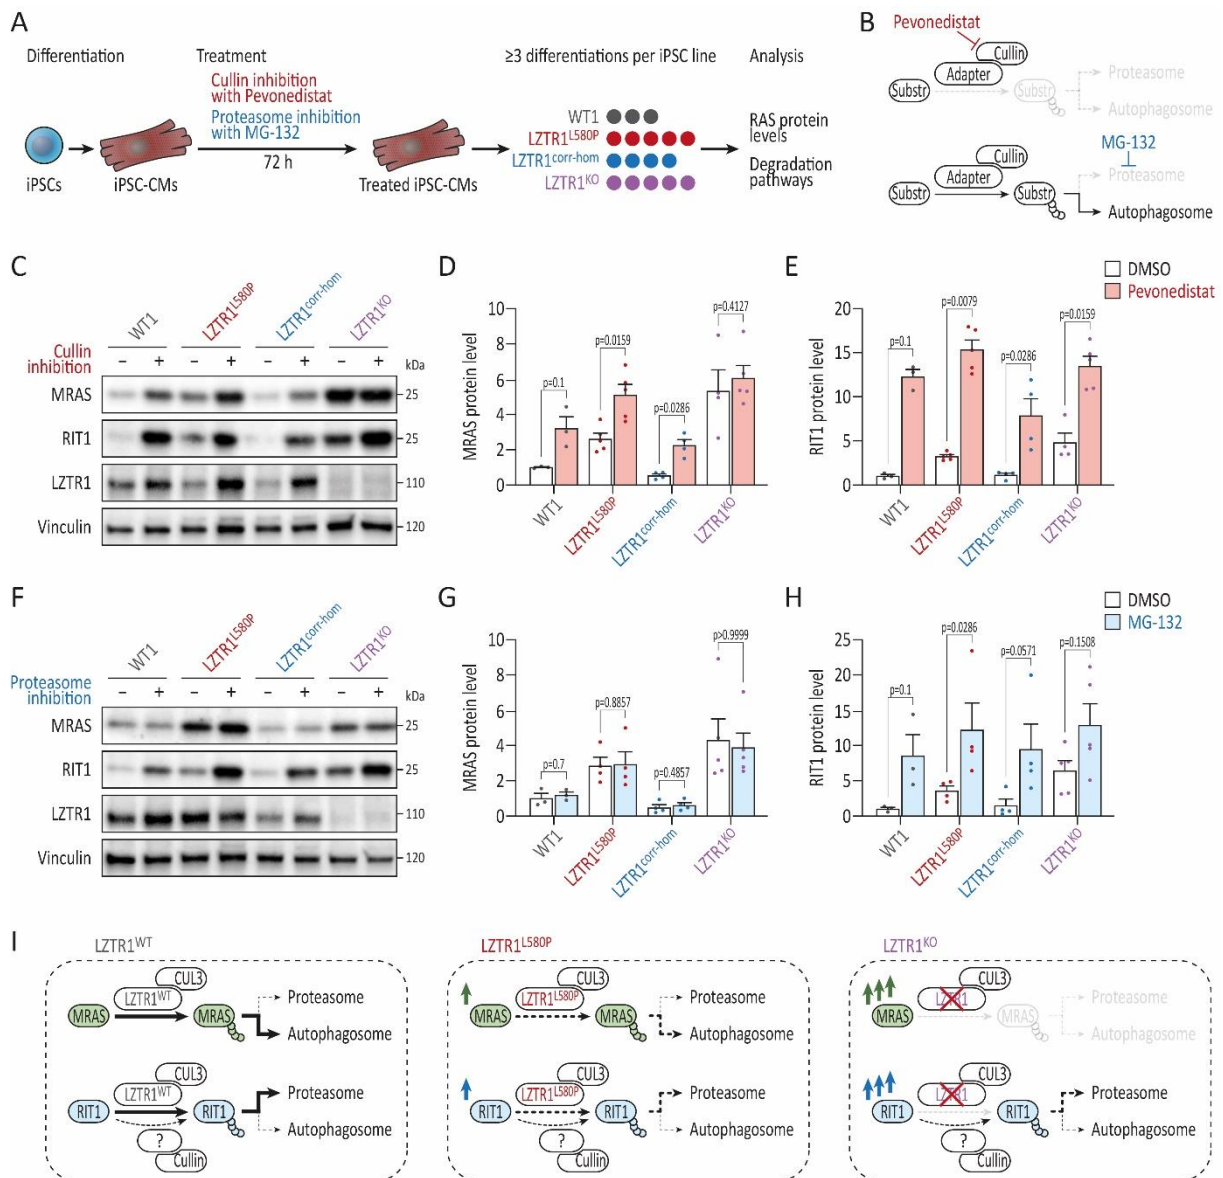

1283

1284 **Figure 8: Homozygous *LZTR1*<sup>L580P</sup> preserves residual function of ubiquitin ligase**

1285 **complex.** (A) Depiction of the experimental design: the WT, the patient-specific, the

1286 homozygous CRISPR-corrected, and *LZTR1*<sup>KO</sup> iPSC lines were differentiated into ventricular

1287 iPSC-CMs and treated with pevonedistat and MG-132 for 3 days to analyze the ubiquitin-

1288 mediated degradation of RAS GTPases; n=3-5 individual differentiations/treatments per iPSC

1289 line. (B) Mode of action of pevonedistat and MG-132 on degradation pathways: pevonedistat

1290 is a selective NEDD8-activating enzyme inhibitor, preventing neddylation of cullin RING

1291 ligases and blocking ubiquitin-mediated degradation via the proteasome and the

1292 autophagosome, whereas MG-132 is a selective inhibitor specifically blocking the proteolytic

1293 activity of the 26S proteasome. **(C)** Representative blots showing MRAS, RIT1, and LZTR1  
1294 levels in WT, patient's, CRISPR-corrected, and LZTR1<sup>KO</sup> iPSC-CMs upon pevonedistat  
1295 treatment for 3 days, assessed by Western blot; Vinculin served as loading control. **(D-E)**  
1296 Quantitative analysis of Western blots for MRAS (D) and RIT1 (E) upon pevonedistat  
1297 treatment; data were normalized to total protein and to the DMSO-treated WT samples on each  
1298 membrane. **(F)** Representative blots showing MRAS, RIT1 and LZTR1 levels in WT, patient's,  
1299 CRISPR-corrected, and LZTR1<sup>KO</sup> iPSC-CMs upon MG-132 treatment for 3 days, assessed by  
1300 Western blot; Vinculin served as loading control. **(G-H)** Quantitative analysis of Western blots  
1301 for MRAS (G) and RIT1 (H) upon MG-132 treatment; data were normalized to total protein  
1302 and to the DMSO-treated WT samples on each membrane. Data were analyzed by  
1303 nonparametric Kruskal-Wallis test with Dunn correction and are presented as mean  $\pm$  SEM (D,  
1304 E, G, H). **(I)** Proposed model for LZTR1-mediated degradation of MRAS and RIT1 for  
1305 LZTR1<sup>WT</sup>, LZTR1<sup>L580P</sup>, and LZTR1<sup>KO</sup>: MRAS is exclusively targeted by the LZTR1<sup>WT</sup>-cullin  
1306 3 ubiquitin ligase complex for degradation via autophagy, whereas RIT1 is additionally  
1307 ubiquitinated by other cullin ubiquitin ligases and degraded predominantly by the proteasome;  
1308 b) the LZTR1<sup>L580P</sup> decreases degradation of MRAS and RIT1; c) loss of LZTR1 completely  
1309 prevents MRAS degradation, while RIT1 degradation remains to some extent in an LZTR1-  
1310 independent manner.

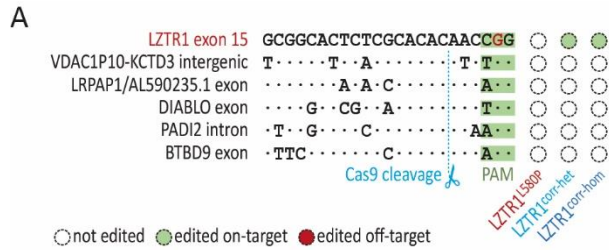

1311

1312 **Figure S1: Off-target screening in CRISPR/Cas9-edited iPSCs. (A)** Sanger sequencing of

1313 the top five predicted off-target regions, ranked by the CFD off-target score using CRISPOR,

1314 revealed no off-target editing of CRISPR/Cas9 in CRISPR-corrected iPSCs compared to the

1315 patient-derived cells.



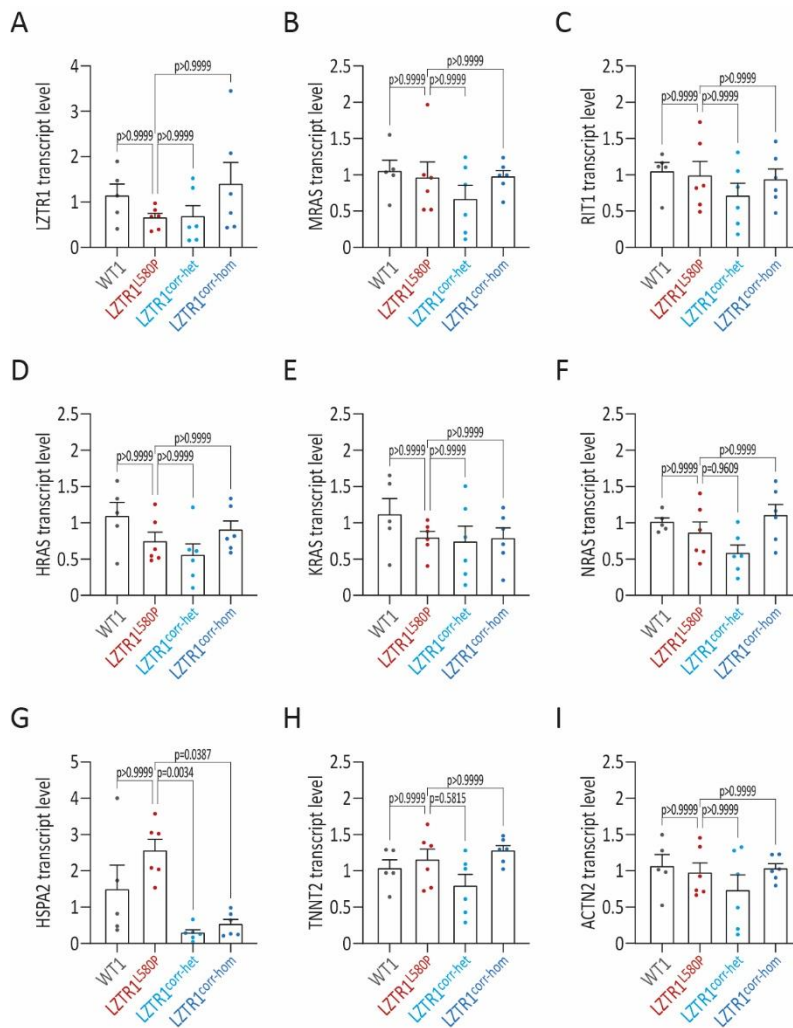

1316

1317 **Figure S2: Homozygous *LZTR1*<sup>L580P</sup> shows no upregulation of RAS GTPases at**  
 1318 **transcriptional level. (A-I) Quantitative gene expression analysis of *LZTR1* (A), of *LZTR1***  
 1319 **substrates *MRAS* (B), *RIT1* (C), *HRAS* (D), *KRAS* (E), and *NRAS* (F), of *HSPA2* (G), and of**  
 1320 **cardiac-specific genes *TNNT2* (H), and *ACTN2* (I) in WT, the patient-specific, and the two**  
 1321 **CRISPR-corrected iPSC-CMs at day 60 of differentiation, assessed by real-time polymerase**  
 1322 **chain reaction, revealed no expression differences at transcriptional level across all iPSC lines;**  
 1323 **samples were analyzed in duplicates and data were normalized to *GAPDH* expression and WT**  
 1324 **controls; n=5-6 independent differentiations per iPSC line. Data were analyzed by**  
 1325 **nonparametric Kruskal-Wallis test with Dunn correction and are presented as mean ± SEM (A-**  
 1326 **I).**

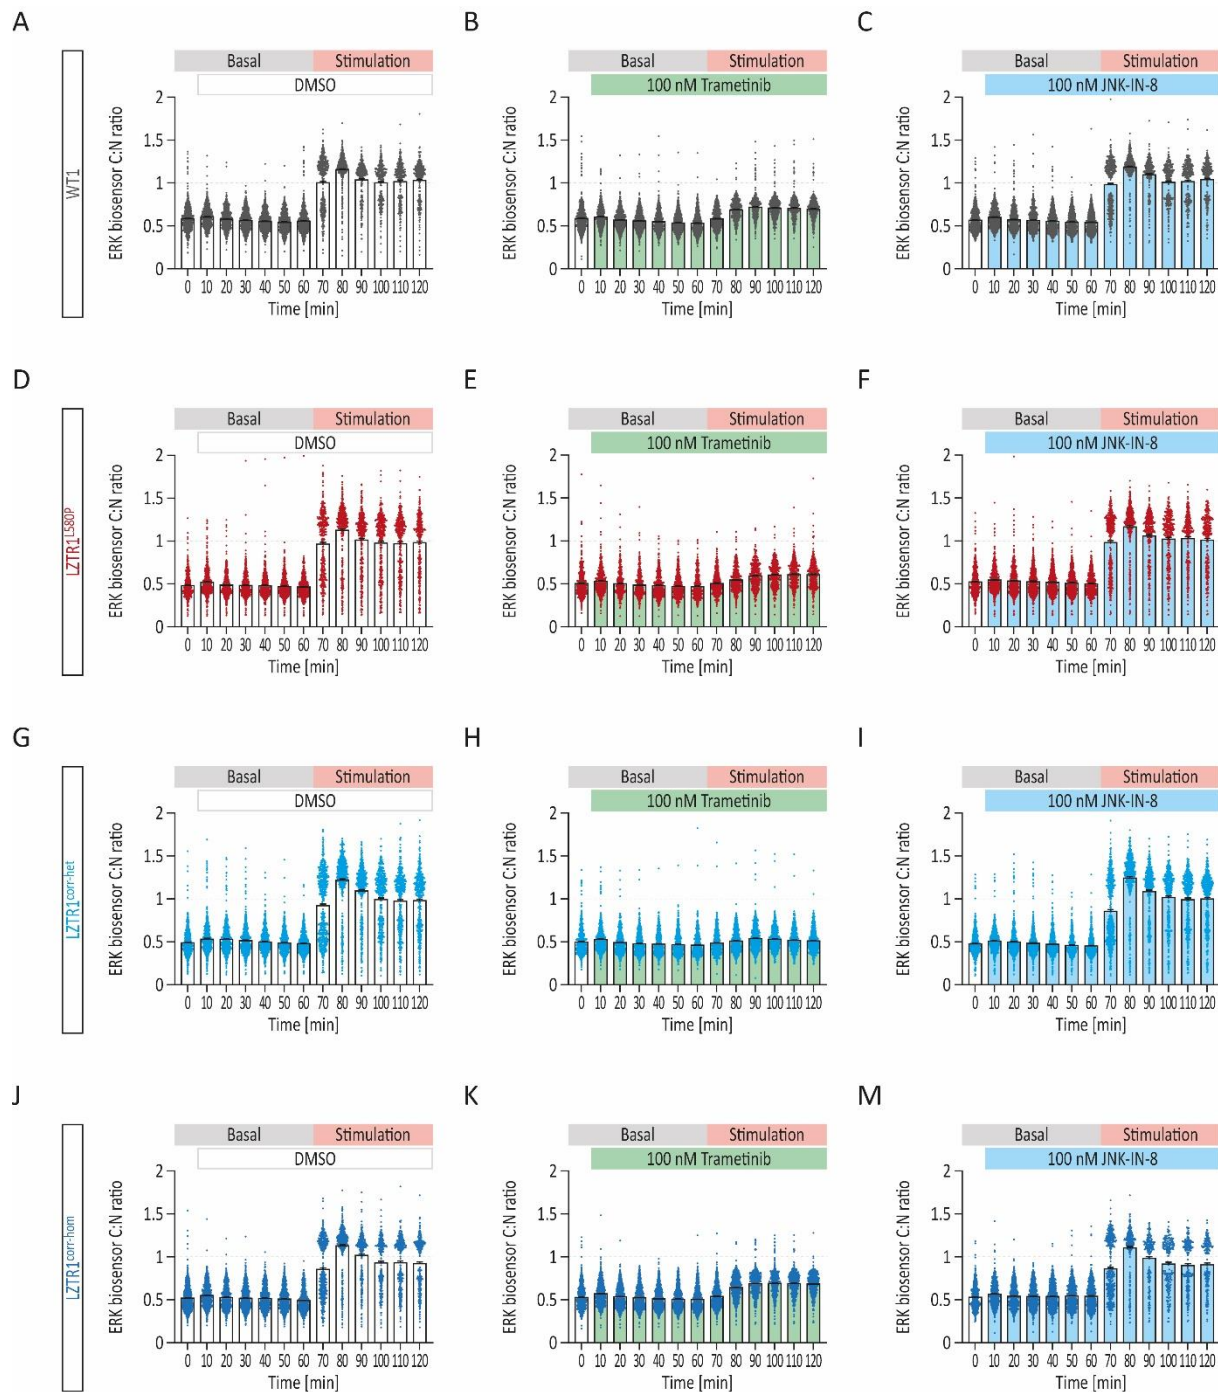

1327

1328 **Figure S3: Biosensor-based analysis of ERK signaling dynamics in real time. (A-M)**

1329 Quantitative analysis of ERK biosensor cytosol/nucleus (C:N) ratio in WT (A-C), the patient-

1330 specific (D-F), and the two CRISPR-corrected (G-M) biosensor-transduced iPSC-CMs treated

1331 with MEK inhibitor trametinib, with JNK inhibitor JNK-IN-8, or with DMSO for 60 minutes,

1332 before stimulation with serum for another 60 minutes; n=2 independent differentiations per

1333 iPSC line with n=4-5 individual wells per condition.

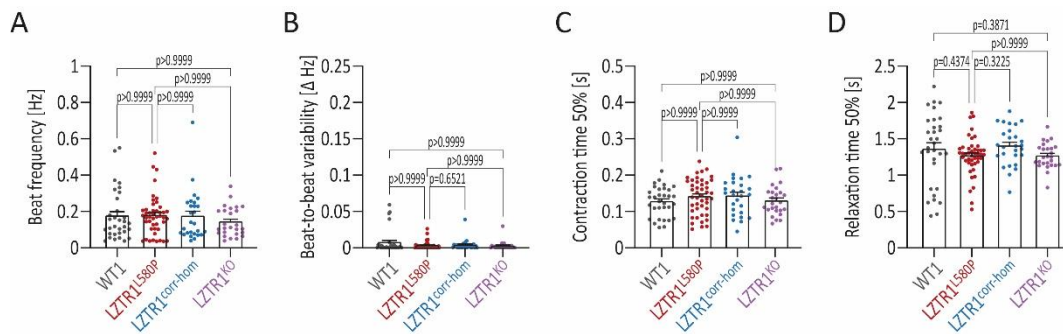

1334

1335 **Figure S4: Homozygous *LZTR1*<sup>L580P</sup> shows unchanged contractile properties. (A-D)**

1336 Quantitative analysis of beating frequency (A), beat-to-beat variability (B), contraction time

1337 (C), and relaxation time (D) in WT, the patient-specific, the homozygous CRISPR-corrected,

1338 and *LZTR1*<sup>KO</sup> iPSC-CMs at day 60 of differentiation, assessed by video-based contractility

1339 analysis in monolayer cultures, revealed no significant differences in contractile function across

1340 all iPSC lines; n=3-9 independent differentiations per iPSC line. Data were analyzed by

1341 nonparametric Kruskal-Wallis test with Dunn correction and are presented as mean ± SEM (A-

1342 D).

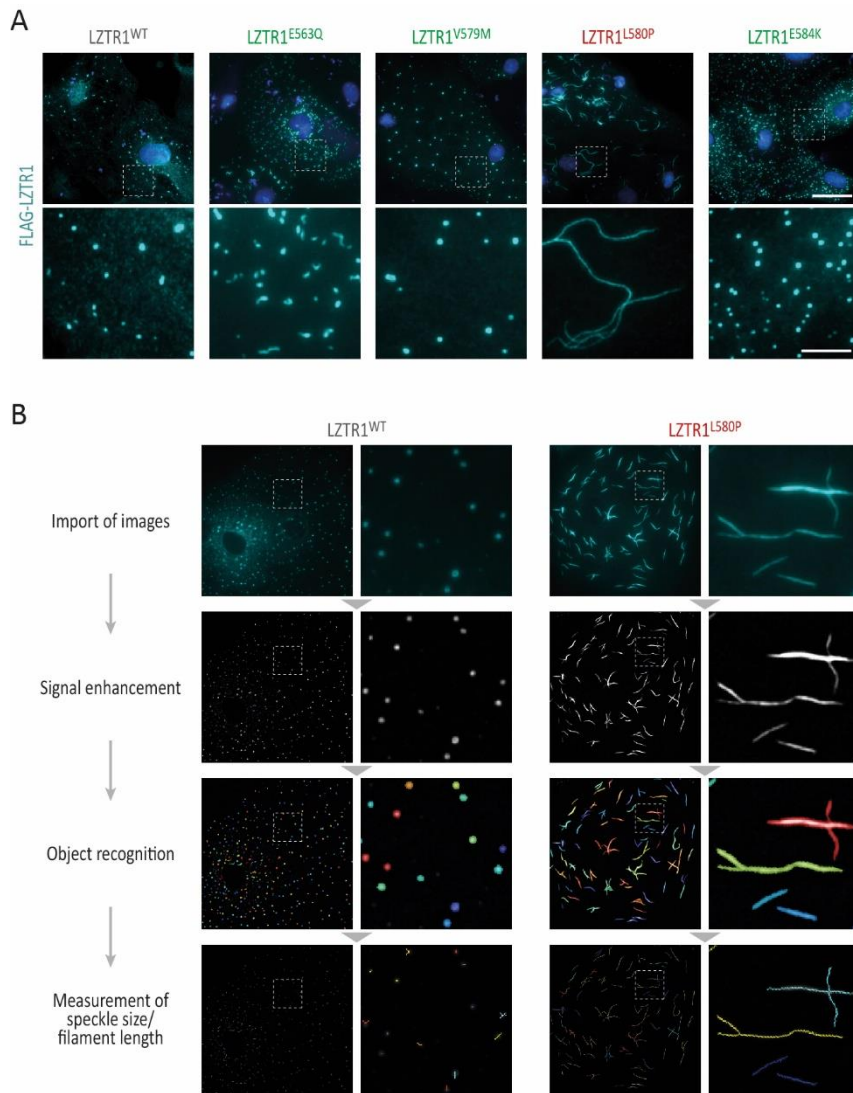

1343

1344 **Figure S5: Unique *LZTR1*<sup>L580P</sup>-induced polymerization of LZTR1 complexes. (A)**

1345 Representative images of WT iPSC-CMs at day 60 of differentiation after single plasmid

1346 transfection stained for FLAG-tagged LZTR1 confirmed that only LZTR1<sup>L580P</sup> forms large

1347 filaments, whereas LZTR1<sup>WT</sup> and the other variants present a speckle-like pattern; nuclei were

1348 counter-stained with Hoechst 33342 (blue); scale bars: 20 μm in upper panel, 5 μm in lower

1349 panel. (B) Customized CellProfiler pipeline for recognition and quantification of speckle size

1350 and filament length in iPSC-CMs with ectopic expression of LZTR1 variants.



A

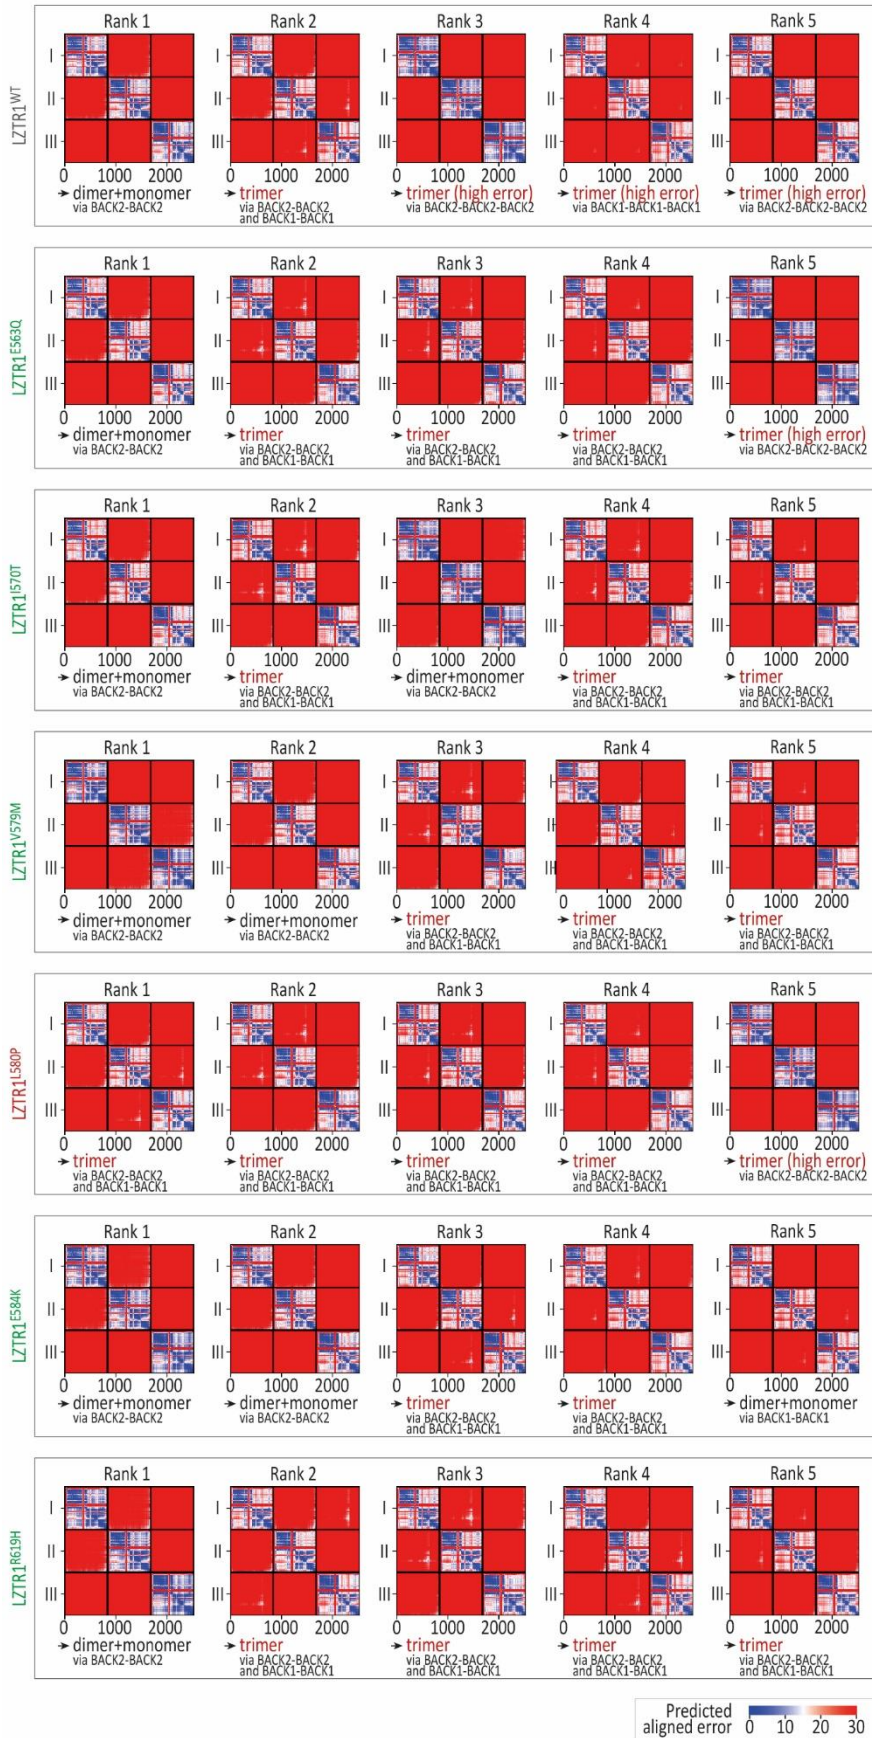

1351

1352 **Figure S6: Computational prediction for LZTR1 interactions via ColabFold.** (A) The five  
1353 predicted models for each LZTR1 variant were ranked according to the predicted template  
1354 modeling score and interactions between the chains were inspected through the predicted  
1355 alignment error generated by AlphaFold-multimer.

1356 **Table S1: Clinical characterization of the affected patient**

|                                                                                             |
|---------------------------------------------------------------------------------------------|
| <b>Cardiac findings</b>                                                                     |
| Mild left ventricular hypertrophy                                                           |
| Prolonged QT interval                                                                       |
| Stress-induced cardiac arrhythmias                                                          |
| Pericardial effusion                                                                        |
| <b>Facial characteristics</b>                                                               |
| Down-slanting palpebral fissures                                                            |
| Mild bilateral ptosis                                                                       |
| Triangular facial contour                                                                   |
| Curly hair                                                                                  |
| Low posterior hairline                                                                      |
| High-arched palate                                                                          |
| <b>Physical characteristics</b>                                                             |
| Marfanoid habitus:<br>height 186 cm (75th-90th percentile)<br>weight 56 kg (3th percentile) |
| Pronounced pectus excavatum                                                                 |
| Scoliosis                                                                                   |
| Stretch marks on lower back                                                                 |
| Clinodactyly                                                                                |
| <b>Additional findings</b>                                                                  |
| Mild bilateral sensorineural hearing loss                                                   |

1357

1358 **Table S2: Antibodies used for Western blot, immunocytochemistry and flow cytometry.**

| <b>Primary antibody</b>               | <b>Supplier</b>          | <b>Resource ID</b> |
|---------------------------------------|--------------------------|--------------------|
| $\alpha$ -actinin monoclonal mouse    | Sigma-Aldrich            | RRID:AB_476766     |
| FLAG monoclonal mouse                 | Sigma-Aldrich            | RRID:AB_262044     |
| HA monoclonal rabbit                  | Cell Signaling           | RRID:AB_1549585    |
| His monoclonal rabbit                 | Thermo Fisher Scientific | RRID:AB_2810125    |
| LZTR1 monoclonal rabbit               | Abcam                    | RRID:AB_3076250    |
| MLC2V polyclonal rabbit               | Proteintech              | RRID:AB_2147453    |
| MRAS polyclonal rabbit                | Proteintech              | RRID:AB_10950895   |
| MYC monoclonal mouse                  | Cell Signaling           | RRID:AB_331783     |
| NANOG monoclonal mouse                | Thermo Fisher Scientific | RRID:AB_2536677    |
| OCT3/4-PE monoclonal human            | Miltenyi Biotec          | RRID:AB_2784442    |
| pan-RAS monoclonal mouse              | Merck Millipore          | RRID:AB_2121151    |
| RIT1 polyclonal rabbit                | Abcam                    | RRID:AB_882379     |
| TRA-1-60 monoclonal mouse             | Abcam                    | RRID:AB_778563     |
| TRA-1-60-Alexa488 monoclonal mouse    | BD Biosciences           | RRID:AB_1645379    |
| Vinculin monoclonal mouse             | Sigma-Aldrich            | RRID:AB_477629     |
| <b>Secondary antibody</b>             | <b>Supplier</b>          | <b>Resource ID</b> |
| Alexa488 polyclonal goat anti-rabbit  | Thermo Fisher Scientific | RRID:AB_143165     |
| Alexa555 polyclonal donkey anti-mouse | Thermo Fisher Scientific | RRID:AB_2536180    |
| HRP polyclonal donkey anti-rabbit     | Sigma-Aldrich            | RRID:AB_2722659    |
| HRP polyclonal donkey anti-mouse      | Sigma-Aldrich            | RRID:AB_772210     |

1359



1360 **Table S3: Primer sequences used for PCR and real-time PCR.**

| <b>Gene (gDNA)</b> | <b>Primer</b>                                       |
|--------------------|-----------------------------------------------------|
| LZTR1 Ex15         | CGAGGCCTTGTTCTACCTA /<br>GAGGGGCTCACAGTGGTG         |
| Off-target 1       | GGTTCAGAAGCACTCATCTCC /<br>AAGCCATCAACCCGAAACAA     |
| Off-target 2       | ATGGATCCTGACTGCAACCC /<br>TCTGGGCAGTCTGTGTCTTT      |
| Off-target 3       | GATGCCACAATAACCGCTCC /<br>TGAGGAGACGTGGAGAGGAG      |
| Off-target 4       | AGTAAGGCGTTTGAGTCCCA /<br>AAGAGGCACATGGATGAGGG      |
| Off-target 5       | AACACACTGGGGAAGGAAGT /<br>GAGCTGCTTCCTATCCCCTC      |
| <b>Gene (cDNA)</b> | <b>Primer</b>                                       |
| ACTN2              | GCCAGAGAGAAGGATGCAATCAC /<br>AAGCATGGGAACCTGGAATCAA |
| GAPDH              | GGAGCGAGATCCCTCCAAAAT /<br>GGCTGTTGTCATACTTCTCATGG  |
| HRAS               | ACGCACTGTGGAATCTCGGCAG /<br>TCACGCACCAACGTGTAGAAGG  |
| HSPA2              | GACCAAGGACAATAACCTGCTGG /<br>GGCGTCAATGTCGAAGGTAACC |
| KRAS               | AGTGCCTTGACGATACAG /<br>GCATCATCAACACCCTGTCTT       |
| LZTR1              | GAGCCAACCTCAAGGAGCACT /<br>CAATGTCCACTGGCTGGTCC     |
| MRAS               | CCACCATTGAAGACTCCTACCTG /<br>ACGGAGTAGACGATGAGGAAGC |
| NRAS               | GGCAATCCCATAACAACCCTGAG /<br>GAAACCTCAGCCAAGACCAGAC |
| RIT1               | TTCATCAGCCACCGATTCCC /<br>GCAGGCTCATCATCAATACGG     |
| TNNT2              | ACAGAGCGGAAAAGTGGGAAG /<br>TCGTTGATCCTGTTTCGGAGA    |

1361

1362 **Table S4: Plasmids used in this study.**

| <b>Plasmid</b>                       | <b>Source</b>                                                                      |
|--------------------------------------|------------------------------------------------------------------------------------|
| pcDNA3-HA-LZTR1-WT                   | modified from RRID:Addgene_13512                                                   |
| pcDNA3-FLAG-LZTR1-WT                 | modified from pcDNA3-HA-LZTR1-WT                                                   |
| pcDNA3-HA-LZTR1-E563Q                | modified from pcDNA3-HA-LZTR1-WT                                                   |
| pcDNA3-FLAG-LZTR1-E563Q              | modified from pcDNA3-FLAG-LZTR1-WT                                                 |
| pcDNA3-HA-LZTR1-I570T                | modified from pcDNA3-HA-LZTR1-WT                                                   |
| pcDNA3-HA-LZTR1-V579M                | modified from pcDNA3-HA-LZTR1-WT                                                   |
| pcDNA3-FLAG-LZTR1-V579M              | modified from pcDNA3-FLAG-LZTR1-WT                                                 |
| pcDNA3-HA-LZTR1-L580P                | modified from pcDNA3-HA-LZTR1-WT                                                   |
| pcDNA3-FLAG-LZTR1- L580P             | modified from pcDNA3-FLAG-LZTR1-WT                                                 |
| pcDNA3-HA-LZTR1-E584K                | modified from pcDNA3-HA-LZTR1-WT                                                   |
| pcDNA3-FLAG-LZTR1-E584K              | modified from pcDNA3-FLAG-LZTR1-WT                                                 |
| pcDNA3-HA-LZTR1-R619H                | modified from pcDNA3-HA-LZTR1-WT                                                   |
| pcDNA3-HA-LZTR1- $\Delta$ BTB2-BACK2 | modified from pcDNA3-HA-LZTR1-WT                                                   |
| pLentiPGK Puro DEST ERKKTRClover     | RRID:Addgene_90227                                                                 |
| pMD2.G                               | RRID:Addgene_12259                                                                 |
| psPAX2                               | RRID:Addgene_12260                                                                 |
| pcDNA3.1-LZTR1-Myc-6xHis             | Jens Kroll (Heidelberg University and German Cancer Research Center) <sup>56</sup> |
| pcDNA3.1-LZTR1-L580P-Myc-6xHis       | modified from pcDNA3.1-LZTR1-Myc-6xHis                                             |

1363
